# Supplementary material for: Analysis of genotype diversity and evolution of Dengue virus serotype 2 using complete genomes
Source: PeerJ. 2016 Aug 24;4:e2326. doi: 10.7717/peerj.2326 (PMC5012332; doi:10.7717/peerj.2326)
Supplement: File S1 — The table lists the assigned serial number, GenBank accession number, strain name, genotype, country, collection date and the subpopulation/lineage. Genotypes are designated as follows: S: Sylvatic, C: Cosmopolitan, AI: Asian I, AII: Asian II, AM: American, AA: Asian/American genotype. In case of non-availability of data, the country or Collection date fields of corresponding entries are given as ‘NA’. [file peerj-04-2326-s001.xls]

## Sheet: Sheet1
Serial number	GenBank Accession	DENV-2 strain name	Country	Year	Genotype	Lineage
1	DQ181801	Dengue virus type 2 strain ThD2_0284_90	Thailand	1990	AA	AA1
2	AF119661	Dengue virus type 2 China isolate 04	China	1985	AA	AA1
3	EU482449	Dengue virus 2 isolate DENV-2/VN/BID-V1004/2006	Viet Nam	2006	AA	AA1
4	EU482648	Dengue virus 2 isolate DENV-2/VN/BID-V711/2006	Viet Nam	2006	AA	AA1
5	EU482660	Dengue virus 2 isolate DENV-2/VN/BID-V723/2006	Viet Nam	2006	AA	AA1
6	EU482662	Dengue virus 2 isolate DENV-2/VN/BID-V725/2006	Viet Nam	2006	AA	AA1
7	EU482664	Dengue virus 2 isolate DENV-2/VN/BID-V727/2006	Viet Nam	2006	AA	AA1
8	EU482666	Dengue virus 2 isolate DENV-2/VN/BID-V729/2006	Viet Nam	2006	AA	AA1
9	EU482778	Dengue virus 2 isolate DENV-2/VN/BID-V756/2003	Viet Nam	2003	AA	AA1
10	EU482779	Dengue virus 2 isolate DENV-2/VN/BID-V757/2003	Viet Nam	2003	AA	AA1
11	EU482780	Dengue virus 2 isolate DENV-2/VN/BID-V758/2003	Viet Nam	2003	AA	AA1
12	EU482781	Dengue virus 2 isolate DENV-2/VN/BID-V759/2003	Viet Nam	2003	AA	AA1
13	EU482783	Dengue virus 2 isolate DENV-2/VN/BID-V761/2003	Viet Nam	2003	AA	AA1
14	EU482785	Dengue virus 2 isolate DENV-2/VN/BID-V763/2003	Viet Nam	2003	AA	AA1
15	EU482787	Dengue virus 2 isolate DENV-2/VN/BID-V765/2003	Viet Nam	2003	AA	AA1
16	EU482788	Dengue virus 2 isolate DENV-2/VN/BID-V766/2003	Viet Nam	2003	AA	AA1
17	FJ639697	Dengue virus 2 isolate DENV-2/KH/BID-V2020/2001	Cambodia	2001	AA	AA1
18	FJ639698	Dengue virus 2 isolate DENV-2/KH/BID-V2021/2002	Cambodia	2002	AA	AA1
19	FJ639699	Dengue virus 2 isolate DENV-2/KH/BID-V2022/2002	Cambodia	2002	AA	AA1
20	FJ639700	Dengue virus 2 isolate DENV-2/KH/BID-V2023/2002	Cambodia	2002	AA	AA1
21	FJ639701	Dengue virus 2 isolate DENV-2/KH/BID-V2024/2002	Cambodia	2002	AA	AA1
22	FJ639702	Dengue virus 2 isolate DENV-2/KH/BID-V2030/2003	Cambodia	2003	AA	AA1
23	FJ639703	Dengue virus 2 isolate DENV-2/KH/BID-V2033/2003	Cambodia	2003	AA	AA1
24	FM210202	Dengue virus 2 isolate DF768	Viet Nam	2004	AA	AA1
25	FM210203	Dengue virus 2 isolate DF900	Viet Nam	2003	AA	AA1
26	FM210204	Dengue virus 2 isolate MD903	Viet Nam	2003	AA	AA1
27	FM210208	Dengue virus 2 isolate DF707	Viet Nam	2003	AA	AA1
28	FM210209	Dengue virus 2 isolate DF726	Viet Nam	2003	AA	AA1
29	FM210210	Dengue virus 2 isolate DF727	Viet Nam	2003	AA	AA1
30	FM210212	Dengue virus 2 isolate MD902	Viet Nam	2003	AA	AA1
31	FM210213	Dengue virus 2 isolate MD1504	Viet Nam	2005	AA	AA1
32	FM210217	Dengue virus 2 isolate DF404	Viet Nam	1999	AA	AA1
33	FM210218	Dengue virus 2 isolate DF593	Viet Nam	2002	AA	AA1
34	FM210219	Dengue virus 2 isolate DF670	Viet Nam	2003	AA	AA1
35	FM210220	Dengue virus 2 isolate DF674	Viet Nam	2003	AA	AA1
36	FM210221	Dengue virus 2 isolate DF699	Viet Nam	2003	AA	AA1
37	FM210222	Dengue virus 2 isolate DF755	Viet Nam	2004	AA	AA1
38	FM210223	Dengue virus 2 isolate DF897	Viet Nam	2003	AA	AA1
39	FM210224	Dengue virus 2 isolate MD518	Viet Nam	2001	AA	AA1
40	FM210225	Dengue virus 2 isolate MD594	Viet Nam	2001	AA	AA1
41	FM210226	Dengue virus 2 isolate MD861	Viet Nam	2002	AA	AA1
42	FM210227	Dengue virus 2 isolate MD863	Viet Nam	2002	AA	AA1
43	FM210228	Dengue virus 2 isolate MD917	Viet Nam	2003	AA	AA1
44	FM210229	Dengue virus 2 isolate MD919	Viet Nam	2003	AA	AA1
45	FM210230	Dengue virus 2 isolate MD944	Viet Nam	2003	AA	AA1
46	FM210232	Dengue virus 2 isolate MD1270	Viet Nam	2004	AA	AA1
47	FM210234	Dengue virus 2 isolate MD1366	Viet Nam	2004	AA	AA1
48	FM210235	Dengue virus 2 isolate MD1515	Viet Nam	2005	AA	AA1
49	FM210236	Dengue virus 2 isolate CSF381	Viet Nam	2004	AA	AA1
50	FM210237	Dengue virus 2 isolate DF657	Viet Nam	2003	AA	AA1
51	FM210238	Dengue virus 2 isolate MD510	Viet Nam	2001	AA	AA1
52	FM210239	Dengue virus 2 isolate MD1244	Viet Nam	2004	AA	AA1
53	FM210241	Dengue virus 2 isolate MD1275	Viet Nam	2004	AA	AA1
54	FM210243	Dengue virus 2 isolate MD1280	Viet Nam	2004	AA	AA1
55	FM210244	Dengue virus 2 isolate MD1284	Viet Nam	2004	AA	AA1
56	AB479041	NA	Viet Nam	2002	AA	AA1
57	AB479042	NA	Viet Nam	2002	AA	AA1
58	JF730044	Dengue virus 2 isolate DENV-2/KH/BID-V2019/2001	Cambodia	2001	AA	AA1
59	FJ898450	Dengue virus 2 isolate DENV-2/VI/BID-V2948/1990	Virgin Islands	1990	AA	AA2
60	EU529695	Dengue virus 2 isolate DENV-2/US/BID-V1058/1994	USA	1994	AA	AA2
61	EU529700	Dengue virus 2 isolate DENV-2/US/BID-V1085/1994	USA	1994	AA	AA2
62	EU482739	Dengue virus 2 isolate DENV-2/US/BID-V682/1994	USA	1994	AA	AA2
63	GQ398271	Dengue virus 2 strain DENV-2/PR/15DN/1994	Puerto Rico	1994	AA	AA2
64	GQ398274	Dengue virus 2 strain DENV-2/PR/23DN/1994	Puerto Rico	1994	AA	AA2
65	GQ398279	Dengue virus 2 strain DENV-2/PR/24DN/1994	Puerto Rico	1994	AA	AA2
66	GQ398276	Dengue virus 2 strain DENV-2/PR/26DN/1994	Puerto Rico	1994	AA	AA2
67	GQ398281	Dengue virus 2 strain DENV-2/PR/27DN/1994	Puerto Rico	1994	AA	AA2
68	GQ398270	Dengue virus 2 strain DENV-2/PR/2DN/1994	Puerto Rico	1994	AA	AA2
69	GQ398275	Dengue virus 2 strain DENV-2/PR/33DN/1994	Puerto Rico	1994	AA	AA2
70	GQ398277	Dengue virus 2 strain DENV-2/PR/38DN/1994	Puerto Rico	1994	AA	AA2
71	GQ398280	Dengue virus 2 strain DENV-2/PR/39DN/1994	Puerto Rico	1994	AA	AA2
72	GQ398278	Dengue virus 2 strain DENV-2/PR/40DN/1994	Puerto Rico	1994	AA	AA2
73	GQ398272	Dengue virus 2 strain DENV-2/PR/49DN/1994	Puerto Rico	1994	AA	AA2
74	GQ398273	Dengue virus 2 strain DENV-2/PR/8DN/1994	Puerto Rico	1994	AA	AA2
75	EU569706	Dengue virus 2 isolate DENV-2/US/BID-V1367/1995	USA	1995	AA	AA2
76	EU569703	Dengue virus 2 isolate DENV-2/US/BID-V1055/1996	USA	1996	AA	AA2
77	EU569709	Dengue virus 2 isolate DENV-2/US/BID-V1376/1996	USA	1996	AA	AA2
78	EU596485	Dengue virus 2 isolate DENV-2/US/BID-V1378/1996	USA	1996	AA	AA2
79	EU569710	Dengue virus 2 isolate DENV-2/US/BID-V1383/1996	USA	1996	AA	AA2
80	EU596486	Dengue virus 2 isolate DENV-2/US/BID-V1385/1996	USA	1996	AA	AA2
81	EU677141	Dengue virus 2 isolate DENV-2/US/BID-V1424/1996	USA	1996	AA	AA2
82	EU569713	Dengue virus 2 isolate DENV-2/US/BID-V1395/1997	USA	1997	AA	AA2
83	EU569714	Dengue virus 2 isolate DENV-2/US/BID-V1396/1997	USA	1997	AA	AA2
84	EU569715	Dengue virus 2 isolate DENV-2/US/BID-V1397/1997	USA	1997	AA	AA2
85	EU569716	Dengue virus 2 isolate DENV-2/US/BID-V1398/1997	USA	1997	AA	AA2
86	EU569717	Dengue virus 2 isolate DENV-2/US/BID-V1399/1997	USA	1997	AA	AA2
87	EU569718	Dengue virus 2 isolate DENV-2/US/BID-V1401/1997	USA	1997	AA	AA2
88	EU569719	Dengue virus 2 isolate DENV-2/US/BID-V1404/1997	USA	1997	AA	AA2
89	EU569720	Dengue virus 2 isolate DENV-2/US/BID-V1409/1997	USA	1997	AA	AA2
90	EU482547	Dengue virus 2 isolate DENV-2/US/BID-V1034/1998	USA	1998	AA	AA2
91	EU482550	Dengue virus 2 isolate DENV-2/US/BID-V1038/1998	USA	1998	AA	AA2
92	EU482554	Dengue virus 2 isolate DENV-2/US/BID-V1042/1998	USA	1998	AA	AA2
93	EU482565	Dengue virus 2 isolate DENV-2/US/BID-V1084/1998	USA	1998	AA	AA2
94	EU660400	Dengue virus 2 isolate DENV-2/US/BID-V1388/1998	USA	1998	AA	AA2
95	EU569711	Dengue virus 2 isolate DENV-2/US/BID-V1392/1998	USA	1998	AA	AA2
96	EU569712	Dengue virus 2 isolate DENV-2/US/BID-V1393/1998	USA	1998	AA	AA2
97	EU596487	Dengue virus 2 isolate DENV-2/US/BID-V1394/1998	USA	1998	AA	AA2
98	EU482727	Dengue virus 2 isolate DENV-2/US/BID-V596/1998	USA	1998	AA	AA2
99	EU482728	Dengue virus 2 isolate DENV-2/US/BID-V597/1998	USA	1998	AA	AA2
100	EU482732	Dengue virus 2 isolate DENV-2/US/BID-V675/1998	USA	1998	AA	AA2
101	EU482733	Dengue virus 2 isolate DENV-2/US/BID-V676/1998	USA	1998	AA	AA2
102	EU482738	Dengue virus 2 isolate DENV-2/US/BID-V681/1998	USA	1998	AA	AA2
103	EU482557	Dengue virus 2 isolate DENV-2/US/BID-V1048/1999	USA	1999	AA	AA2
104	EU677143	Dengue virus 2 isolate DENV-2/US/BID-V1426/1999	USA	1999	AA	AA2
105	EU677144	Dengue virus 2 isolate DENV-2/US/BID-V1427/1999	USA	1999	AA	AA2
106	EU482729	Dengue virus 2 isolate DENV-2/US/BID-V598/1999	USA	1999	AA	AA2
107	EU482730	Dengue virus 2 isolate DENV-2/US/BID-V599/1999	USA	1999	AA	AA2
108	EU687222	Dengue virus 2 isolate DENV-2/US/BID-V1461/2000	USA	2000	AA	AA2
109	EU687223	Dengue virus 2 isolate DENV-2/US/BID-V1462/2000	USA	2000	AA	AA2
110	EU687224	Dengue virus 2 isolate DENV-2/US/BID-V1463/2000	USA	2000	AA	AA2
111	EU687225	Dengue virus 2 isolate DENV-2/US/BID-V1464/2000	USA	2000	AA	AA2
112	EU687227	Dengue virus 2 isolate DENV-2/US/BID-V1467/2001	USA	2001	AA	AA2
113	EU687228	Dengue virus 2 isolate DENV-2/US/BID-V1468/2001	USA	2001	AA	AA2
114	EU687229	Dengue virus 2 isolate DENV-2/US/BID-V1469/2001	USA	2001	AA	AA2
115	EU687230	Dengue virus 2 isolate DENV-2/US/BID-V1470/2001	USA	2001	AA	AA2
116	EU687231	Dengue virus 2 isolate DENV-2/US/BID-V1471/2001	USA	2001	AA	AA2
117	EU687232	Dengue virus 2 isolate DENV-2/US/BID-V1472/2001	USA	2001	AA	AA2
118	EU482593	Dengue virus 2 isolate DENV-2/US/BID-V854/2001	USA	2001	AA	AA2
119	EU482722	Dengue virus 2 isolate DENV-2/US/BID-V591/2002	USA	2002	AA	AA2
120	EU482723	Dengue virus 2 isolate DENV-2/US/BID-V592/2002	USA	2002	AA	AA2
121	EU687199	Dengue virus 2 isolate DENV-2/US/BID-V1482/2003	USA	2003	AA	AA2
122	EU687235	Dengue virus 2 isolate DENV-2/US/BID-V1483/2003	USA	2003	AA	AA2
123	EU687236	Dengue virus 2 isolate DENV-2/US/BID-V1484/2003	USA	2003	AA	AA2
124	EU687237	Dengue virus 2 isolate DENV-2/US/BID-V1486/2003	USA	2003	AA	AA2
125	EU687238	Dengue virus 2 isolate DENV-2/US/BID-V1487/2003	USA	2003	AA	AA2
126	EU687240	Dengue virus 2 isolate DENV-2/US/BID-V1492/2003	USA	2003	AA	AA2
127	EU687241	Dengue virus 2 isolate DENV-2/US/BID-V1493/2003	USA	2003	AA	AA2
128	EU529693	Dengue virus 2 isolate DENV-2/US/BID-V1046/2004	USA	2004	AA	AA2
129	EU677146	Dengue virus 2 isolate DENV-2/US/BID-V1431/2004	USA	2004	AA	AA2
130	EU677147	Dengue virus 2 isolate DENV-2/US/BID-V1432/2004	USA	2004	AA	AA2
131	EU687213	Dengue virus 2 isolate DENV-2/US/BID-V1434/2004	USA	2004	AA	AA2
132	EU687214	Dengue virus 2 isolate DENV-2/US/BID-V1435/2004	USA	2004	AA	AA2
133	EU687215	Dengue virus 2 isolate DENV-2/US/BID-V1436/2004	USA	2004	AA	AA2
134	EU687242	Dengue virus 2 isolate DENV-2/US/BID-V1494/2004	USA	2004	AA	AA2
135	EU687243	Dengue virus 2 isolate DENV-2/US/BID-V1495/2004	USA	2004	AA	AA2
136	EU687244	Dengue virus 2 isolate DENV-2/US/BID-V1496/2004	USA	2004	AA	AA2
137	EU482556	Dengue virus 2 isolate DENV-2/US/BID-V1045/2005	USA	2005	AA	AA2
138	EU726770	Dengue virus 2 isolate DENV-2/US/BID-V1440/2005	USA	2005	AA	AA2
139	EU781135	Dengue virus 2 isolate DENV-2/US/BID-V1442/2005	USA	2005	AA	AA2
140	EU687245	Dengue virus 2 isolate DENV-2/US/BID-V1497/2005	USA	2005	AA	AA2
141	EU482724	Dengue virus 2 isolate DENV-2/US/BID-V593/2005	USA	2005	AA	AA2
142	EU482544	Dengue virus 2 isolate DENV-2/US/BID-V1031/2006	USA	2006	AA	AA2
143	EU482548	Dengue virus 2 isolate DENV-2/US/BID-V1035/2006	USA	2006	AA	AA2
144	EU482549	Dengue virus 2 isolate DENV-2/US/BID-V1036/2006	USA	2006	AA	AA2
145	EU482551	Dengue virus 2 isolate DENV-2/US/BID-V1039/2006	USA	2006	AA	AA2
146	EU482552	Dengue virus 2 isolate DENV-2/US/BID-V1040/2006	USA	2006	AA	AA2
147	EU482553	Dengue virus 2 isolate DENV-2/US/BID-V1041/2006	USA	2006	AA	AA2
148	EU529706	Dengue virus 2 isolate DENV-2/US/BID-V585/2006	USA	2006	AA	AA2
149	EU482719	Dengue virus 2 isolate DENV-2/US/BID-V587/2006	USA	2006	AA	AA2
150	EU482720	Dengue virus 2 isolate DENV-2/US/BID-V588/2006	USA	2006	AA	AA2
151	EU482721	Dengue virus 2 isolate DENV-2/US/BID-V589/2006	USA	2006	AA	AA2
152	EU482725	Dengue virus 2 isolate DENV-2/US/BID-V594/2006	USA	2006	AA	AA2
153	EU596488	Dengue virus 2 isolate DENV-2/US/BID-V1410/2007	USA	2007	AA	AA2
154	EU596489	Dengue virus 2 isolate DENV-2/US/BID-V1411/2007	USA	2007	AA	AA2
155	EU596490	Dengue virus 2 isolate DENV-2/US/BID-V1412/2007	USA	2007	AA	AA2
156	EU482568	Dengue virus 2 isolate DENV-2/US/BID-V1164/1986	USA	1986	AA	AA3
157	EU569704	Dengue virus 2 isolate DENV-2/US/BID-V1163/1986	USA	1986	AA	AA3
158	EU482569	Dengue virus 2 isolate DENV-2/US/BID-V1165/1987	USA	1987	AA	AA3
159	EU482570	Dengue virus 2 isolate DENV-2/US/BID-V1166/1987	USA	1987	AA	AA3
160	EU482571	Dengue virus 2 isolate DENV-2/US/BID-V1167/1987	USA	1987	AA	AA3
161	EU482572	Dengue virus 2 isolate DENV-2/US/BID-V1168/1987	USA	1987	AA	AA3
162	EU482573	Dengue virus 2 isolate DENV-2/US/BID-V1169/1987	USA	1987	AA	AA3
163	EU482574	Dengue virus 2 isolate DENV-2/US/BID-V1170/1987	USA	1987	AA	AA3
164	EU482575	Dengue virus 2 isolate DENV-2/US/BID-V1171/1987	USA	1987	AA	AA3
165	EU482576	Dengue virus 2 isolate DENV-2/US/BID-V1172/1987	USA	1987	AA	AA3
166	EU482577	Dengue virus 2 isolate DENV-2/US/BID-V1174/1987	USA	1987	AA	AA3
167	GQ868603	Dengue virus 2 isolate DENV-2/VI/BID-V2946/1987	Virgin Islands	1987	AA	AA3
168	EU482578	Dengue virus 2 isolate DENV-2/US/BID-V1175/1988	USA	1988	AA	AA3
169	EU482579	Dengue virus 2 isolate DENV-2/US/BID-V1176/1988	USA	1988	AA	AA3
170	EU482742	Dengue virus 2 isolate DENV-2/US/BID-V685/1988	USA	1988	AA	AA3
171	EU482747	Dengue virus 2 isolate DENV-2/US/BID-V690/1988	USA	1988	AA	AA3
172	JN819418	Dengue virus 2 isolate DENV-2/VN/BID-V2947/1988	Viet Nam	1988	AA	AA3
173	EU482562	Dengue virus 2 isolate DENV-2/US/BID-V1060/1989	USA	1989	AA	AA3
174	EU482580	Dengue virus 2 isolate DENV-2/US/BID-V1177/1989	USA	1989	AA	AA3
175	EU482581	Dengue virus 2 isolate DENV-2/US/BID-V1178/1989	USA	1989	AA	AA3
176	EU482582	Dengue virus 2 isolate DENV-2/US/BID-V1179/1989	USA	1989	AA	AA3
177	EU482583	Dengue virus 2 isolate DENV-2/US/BID-V1180/1989	USA	1989	AA	AA3
178	EU482584	Dengue virus 2 isolate DENV-2/US/BID-V1181/1989	USA	1989	AA	AA3
179	EU482585	Dengue virus 2 isolate DENV-2/US/BID-V1182/1989	USA	1989	AA	AA3
180	EU482743	Dengue virus 2 isolate DENV-2/US/BID-V686/1989	USA	1989	AA	AA3
181	EU482744	Dengue virus 2 isolate DENV-2/US/BID-V687/1989	USA	1989	AA	AA3
182	EU482745	Dengue virus 2 isolate DENV-2/US/BID-V688/1989	USA	1989	AA	AA3
183	EU482746	Dengue virus 2 isolate DENV-2/US/BID-V689/1989	USA	1989	AA	AA3
184	EU660398	Dengue virus 2 isolate DENV-2/US/BID-V1061/1989	USA	1989	AA	AA3
185	EU482586	Dengue virus 2 isolate DENV-2/US/BID-V1183/1990	USA	1990	AA	AA3
186	EU482587	Dengue virus 2 isolate DENV-2/US/BID-V1188/1990	USA	1990	AA	AA3
187	EU482588	Dengue virus 2 isolate DENV-2/US/BID-V1189/1990	USA	1990	AA	AA3
188	EU482590	Dengue virus 2 isolate DENV-2/US/BID-V851/1990	USA	1990	AA	AA3
189	GQ868540	Dengue virus 2 isolate DENV-2/VE/BID-V3496/1990	Venezuela	1990	AA	AA3
190	HQ012533	Dengue virus 2 strain BR41768/RJ/90	Brazil	1990	AA	AA3
191	HQ012538	Dengue virus 2 strain BR39145/RJ/90	Brazil	1990	AA	AA3
192	EU529701	Dengue virus 2 isolate DENV-2/US/BID-V1087/1991	USA	1991	AA	AA3
193	GQ868541	Dengue virus 2 isolate DENV-2/VE/BID-V3497/1991	Venezuela	1991	AA	AA3
194	GQ868595	Dengue virus 2 isolate DENV-2/VE/BID-V3362/1991	Venezuela	1991	AA	AA3
195	GQ868596	Dengue virus 2 isolate DENV-2/VE/BID-V3363/1991	Venezuela	1991	AA	AA3
196	GQ868597	Dengue virus 2 isolate DENV-2/VE/BID-V3364/1991	Venezuela	1991	AA	AA3
197	GQ868598	Dengue virus 2 isolate DENV-2/VE/BID-V3365/1991	Venezuela	1991	AA	AA3
198	HQ012534	Dengue virus 2 strain BR42727/RJ/91	Brazil	1991	AA	AA3
199	EU482594	Dengue virus 2 isolate DENV-2/US/BID-V855/1992	USA	1992	AA	AA3
200	EU482589	Dengue virus 2 isolate DENV-2/US/BID-V1360/1993	USA	1993	AA	AA3
201	EU569705	Dengue virus 2 isolate DENV-2/US/BID-V1356/1993	USA	1993	AA	AA3
202	EU482736	Dengue virus 2 isolate DENV-2/US/BID-V679/1994	USA	1994	AA	AA3
203	EU482737	Dengue virus 2 isolate DENV-2/US/BID-V680/1994	USA	1994	AA	AA3
204	EU482740	Dengue virus 2 isolate DENV-2/US/BID-V683/1994	USA	1994	AA	AA3
205	EU482741	Dengue virus 2 isolate DENV-2/US/BID-V684/1994	USA	1994	AA	AA3
206	EU529694	Dengue virus 2 isolate DENV-2/US/BID-V1057/1994	USA	1994	AA	AA3
207	GQ398269	Dengue virus 2 strain DENV-2/PR/50DN/1994	Puerto Rico	1994	AA	AA3
208	GQ398282	Dengue virus 2 strain DENV-2/PR/35DN/1994	Puerto Rico	1994	AA	AA3
209	GQ398283	Dengue virus 2 strain DENV-2/PR/37DN/1994	Puerto Rico	1994	AA	AA3
210	GQ398284	Dengue virus 2 strain DENV-2/PR/36DN/1994	Puerto Rico	1994	AA	AA3
211	GQ398285	Dengue virus 2 strain DENV-2/PR/12DN/1994	Puerto Rico	1994	AA	AA3
212	GQ398286	Dengue virus 2 strain DENV-2/PR/42DN/1994	Puerto Rico	1994	AA	AA3
213	GQ398287	Dengue virus 2 strain DENV-2/PR/46DN/1994	Puerto Rico	1994	AA	AA3
214	GQ398288	Dengue virus 2 strain DENV-2/PR/10DN/1994	Puerto Rico	1994	AA	AA3
215	GQ398289	Dengue virus 2 strain DENV-2/PR/30DN/1994	Puerto Rico	1994	AA	AA3
216	GQ398290	Dengue virus 2 strain DENV-2/PR/31DN/1994	Puerto Rico	1994	AA	AA3
217	GQ398291	Dengue virus 2 strain DENV-2/PR/29DN/1994	Puerto Rico	1994	AA	AA3
218	GQ398292	Dengue virus 2 strain DENV-2/PR/6DN/1994	Puerto Rico	1994	AA	AA3
219	GQ398293	Dengue virus 2 strain DENV-2/PR/43DN/1994	Puerto Rico	1994	AA	AA3
220	GQ398294	Dengue virus 2 strain DENV-2/PR/45DN/1994	Puerto Rico	1994	AA	AA3
221	GQ398295	Dengue virus 2 strain DENV-2/PR/14DN/1994	Puerto Rico	1994	AA	AA3
222	GQ398296	Dengue virus 2 strain DENV-2/PR/44DN/1994	Puerto Rico	1994	AA	AA3
223	GQ398297	Dengue virus 2 strain DENV-2/PR/21DN/1994	Puerto Rico	1994	AA	AA3
224	GQ398299	Dengue virus 2 strain DENV-2/PR/25DN/1994	Puerto Rico	1994	AA	AA3
225	GQ398300	Dengue virus 2 strain DENV-2/PR/9DN/1994	Puerto Rico	1994	AA	AA3
226	GQ398302	Dengue virus 2 strain DENV-2/PR/47DN/1994	Puerto Rico	1994	AA	AA3
227	GQ398303	Dengue virus 2 strain DENV-2/PR/34DN/1994	Puerto Rico	1994	AA	AA3
228	GQ398304	Dengue virus 2 strain DENV-2/PR/4DN/1994	Puerto Rico	1994	AA	AA3
229	GQ398305	Dengue virus 2 strain DENV-2/PR/5DN/1994	Puerto Rico	1994	AA	AA3
230	GQ398306	Dengue virus 2 strain DENV-2/PR/22DN/1994	Puerto Rico	1994	AA	AA3
231	GQ398307	Dengue virus 2 strain DENV-2/PR/19DN/1994	Puerto Rico	1994	AA	AA3
232	GQ398308	Dengue virus 2 strain DENV-2/PR/3DN/1994	Puerto Rico	1994	AA	AA3
233	GQ398309	Dengue virus 2 strain DENV-2/PR/1DN/1994	Puerto Rico	1994	AA	AA3
234	GQ398310	Dengue virus 2 strain DENV-2/PR/48DN/1994	Puerto Rico	1994	AA	AA3
235	GQ398311	Dengue virus 2 strain DENV-2/PR/6780DN/1994	Puerto Rico	1994	AA	AA3
236	GQ398312	Dengue virus 2 strain DENV-2/PR/28DN/1994	Puerto Rico	1994	AA	AA3
237	GQ398313	Dengue virus 2 strain DENV-2/PR/11DN/1994	Puerto Rico	1994	AA	AA3
238	GQ398314	Dengue virus 2 strain DENV-2/PR/13DN/1994	Puerto Rico	1994	AA	AA3
239	HQ012535	Dengue virus 2 strain BR48622/CE/94	Brazil	1994	AA	AA3
240	EU569707	Dengue virus 2 isolate DENV-2/US/BID-V1368/1995	USA	1995	AA	AA3
241	EU569708	Dengue virus 2 isolate DENV-2/US/BID-V1373/1995	USA	1995	AA	AA3
242	EU660399	Dengue virus 2 isolate DENV-2/US/BID-V1372/1995	USA	1995	AA	AA3
243	GQ398298	Dengue virus 2 strain DENV-2/PR/16DN/1995	Puerto Rico	1995	AA	AA3
244	GQ398301	Dengue virus 2 strain DENV-2/PR/17DN/1995	Puerto Rico	1995	AA	AA3
245	EU482561	Dengue virus 2 isolate DENV-2/US/BID-V1054/1996	USA	1996	AA	AA3
246	EU687220	Dengue virus 2 isolate DENV-2/VE/BID-V1456/1996	Venezuela	1996	AA	AA3
247	FJ898465	Dengue virus 2 isolate DENV-2/VE/BID-V2941/1998	Venezuela	1998	AA	AA3
248	GQ868552	Dengue virus 2 isolate DENV-2/CO/BID-V3368/1998	Colombia	1998	AA	AA3
249	HQ012536	Dengue virus 2 strain BR61310/RJ/98	Brazil	1998	AA	AA3
250	HQ012537	Dengue virus 2 strain BR64905/RJ/99	Brazil	1999	AA	AA3
251	FJ850072	Dengue virus 2 isolate DENV-2/BR/BID-V2376/2000	Brazil	2000	AA	AA3
252	AF100466	Dengue virus type 2 strain Mara4	NA	NA	AA	AA3
253	AF489932	Dengue Virus Type 2 strain BR64022	NA	NA	AA	AA3
254	M20558	Dengue virus type 2 Jamaica/N.1409	Jamaica	NA	AA	AA3
255	JN819419	Dengue virus 2 isolate DENV-2/BR/BID-V2377/2000	Brazil	2000	AA	AA4
256	FJ850074	Dengue virus 2 isolate DENV-2/BR/BID-V2379/2001	Brazil	2001	AA	AA4
257	FJ850076	Dengue virus 2 isolate DENV-2/BR/BID-V2382/2002	Brazil	2002	AA	AA4
258	FJ850078	Dengue virus 2 isolate DENV-2/BR/BID-V2386/2003	Brazil	2003	AA	AA4
259	GQ868640	Dengue virus 2 isolate DENV-2/BR/BID-V2385/2003	Brazil	2003	AA	AA4
260	FJ850082	Dengue virus 2 isolate DENV-2/BR/BID-V2390/2004	Brazil	2004	AA	AA4
261	FJ850085	Dengue virus 2 isolate DENV-2/BR/BID-V2393/2005	Brazil	2005	AA	AA4
262	FJ850088	Dengue virus 2 isolate DENV-2/BR/BID-V2396/2006	Brazil	2006	AA	AA4
263	GQ868553	Dengue virus 2 isolate DENV-2/CO/BID-V3369/1999	Colombia	1999	AA	AA4
264	FJ024477	Dengue virus 2 isolate DENV-2/CO/BID-V1603/2004	Colombia	2004	AA	AA4
265	GQ868554	Dengue virus 2 isolate DENV-2/CO/BID-V3370/2004	Colombia	2004	AA	AA4
266	EU854294	Dengue virus 2 isolate DENV-2/CO/BID-V1601/2005	Colombia	2005	AA	AA4
267	FJ024473	Dengue virus 2 isolate DENV-2/CO/BID-V1594/2005	Colombia	2005	AA	AA4
268	FJ024474	Dengue virus 2 isolate DENV-2/CO/BID-V1595/2005	Colombia	2005	AA	AA4
269	FJ024475	Dengue virus 2 isolate DENV-2/CO/BID-V1596/2005	Colombia	2005	AA	AA4
270	FJ182012	Dengue virus 2 isolate DENV-2/CO/BID-V1597/2005	Colombia	2005	AA	AA4
271	GQ868555	Dengue virus 2 isolate DENV-2/CO/BID-V3371/2005	Colombia	2005	AA	AA4
272	GQ868556	Dengue virus 2 isolate DENV-2/CO/BID-V3372/2005	Colombia	2005	AA	AA4
273	GQ868557	Dengue virus 2 isolate DENV-2/CO/BID-V3373/2005	Colombia	2005	AA	AA4
274	GQ868558	Dengue virus 2 isolate DENV-2/CO/BID-V3375/2007	Colombia	2007	AA	AA4
275	GU131947	Dengue virus 2 isolate DENV-2/CO/BID-V3374/2007	Colombia	2007	AA	AA4
276	EU482545	Dengue virus 2 isolate DENV-2/US/BID-V1032/1998	USA	1998	AA	AA4
277	EU482546	Dengue virus 2 isolate DENV-2/US/BID-V1033/1998	USA	1998	AA	AA4
278	EU482560	DENV-2/US/BID-V1052/1998	USA	1998	AA	AA4
279	EU482734	Dengue virus 2 isolate DENV-2/US/BID-V677/1998	USA	1998	AA	AA4
280	EU482735	Dengue virus 2 isolate DENV-2/US/BID-V678/1998	USA	1998	AA	AA4
281	EU677142	DENV-2/US/BID-V1425/1999	USA	1999	AA	AA4
282	EU726775	Dengue virus 2 isolate DENV-2/VE/BID-V1457/1996	Venezuela	1996	AA	AA4
283	FJ898466	Dengue virus 2 isolate DENV-2/VE/BID-V2942/2000	Venezuela	2000	AA	AA4
284	JN819408	Dengue virus 2 isolate DENV-2/VE/BID-V2161/2001	Venezuela	2001	AA	AA4
285	FJ639734	Dengue virus 2 isolate DENV-2/VE/BID-V2160/2003	Venezuela	2003	AA	AA4
286	FJ639783	Dengue virus 2 isolate DENV-2/VE/BID-V2216/2003	Venezuela	2003	AA	AA4
287	FJ639788	Dengue virus 2 isolate DENV-2/VE/BID-V2221/2004	Venezuela	2004	AA	AA4
288	FJ850112	Dengue virus 2 isolate DENV-2/VE/BID-V2424/2004	Venezuela	2004	AA	AA4
289	FJ639732	Dengue virus 2 isolate DENV-2/VE/BID-V2158/2005	Venezuela	2005	AA	AA4
290	FJ639733	Dengue virus 2 isolate DENV-2/VE/BID-V2159/2005	Venezuela	2005	AA	AA4
291	FJ639809	Dengue virus 2 isolate DENV-2/VE/BID-V2246/2005	Venezuela	2005	AA	AA4
292	FJ898467	Dengue virus 2 isolate DENV-2/VE/BID-V2944/2005	Venezuela	2005	AA	AA4
293	FJ639822	Dengue virus 2 isolate DENV-2/VE/BID-V2262/2006	Venezuela	2006	AA	AA4
294	HQ332184	Dengue virus 2 strain VE_61069_2006	Venezuela	2006	AA	AA4
295	EU482604	Dengue virus 2 isolate DENV-2/VE/BID-V1095/2007	Venezuela	2007	AA	AA4
296	EU482605	Dengue virus 2 isolate DENV-2/VE/BID-V1104/2007	Venezuela	2007	AA	AA4
297	EU482606	Dengue virus 2 isolate DENV-2/VE/BID-V1105/2007	Venezuela	2007	AA	AA4
298	EU482607	Dengue virus 2 isolate DENV-2/VE/BID-V1107/2007	Venezuela	2007	AA	AA4
299	EU482608	Dengue virus 2 isolate DENV-2/VE/BID-V1111/2007	Venezuela	2007	AA	AA4
300	FJ850105	Dengue virus 2 isolate DENV-2/VE/BID-V2470/2007	Venezuela	2007	AA	AA4
301	GQ868641	Dengue virus 2 isolate DENV-2/VE/BID-V1144/2007	Venezuela	2007	AA	AA4
302	HQ332185	Dengue virus 2 strain VE_61082_2007	Venezuela	2007	AA	AA4
303	HQ332186	Dengue virus 2 strain VE_61115_2007	Venezuela	2007	AA	AA4
304	HQ332187	Dengue virus 2 strain VE_61133_2007	Venezuela	2007	AA	AA4
305	HQ332188	Dengue virus 2 strain VE_61136_2007	Venezuela	2007	AA	AA4
306	HQ332189	Dengue virus 2 strain VE_61154_2007	Venezuela	2007	AA	AA4
307	HQ332190	Dengue virus 2 strain VE_61095_2007	Venezuela	2007	AA	AA4
308	JN819407	Dengue virus 2 isolate DENV-2/VE/BID-V2613/2007	Venezuela	2007	AA	AA4
309	FJ850106	Dengue virus 2 isolate DENV-2/VE/BID-V2476/2008	Venezuela	2008	AA	AA4
310	FJ850107	Dengue virus 2 isolate DENV-2/VE/BID-V2477/2008	Venezuela	2008	AA	AA4
311	FJ850108	Dengue virus 2 isolate DENV-2/VE/BID-V2478/2008	Venezuela	2008	AA	AA4
312	FJ850091	Dengue virus 2 isolate DENV-2/BR/BID-V2399/2007	Brazil	2007	AA	AA5
313	GQ199890	Dengue virus 2 isolate DENV-2/BR/BID-V2402/2008	Brazil	2008	AA	AA5
314	GQ868549	Dengue virus 2 isolate DENV-2/BR/BID-V3481/2008	Brazil	2008	AA	AA5
315	GQ868550	Dengue virus 2 isolate DENV-2/BR/BID-V3483/2008	Brazil	2008	AA	AA5
316	GQ868551	Dengue virus 2 isolate DENV-2/BR/BID-V3486/2008	Brazil	2008	AA	AA5
317	GU131864	Dengue virus 2 isolate DENV-2/BR/BID-V3495/2008	Brazil	2008	AA	AA5
318	GU131879	Dengue virus 2 isolate DENV-2/BR/BID-V3638/2008	Brazil	2008	AA	AA5
319	GU131880	Dengue virus 2 isolate DENV-2/BR/BID-V3640/2008	Brazil	2008	AA	AA5
320	GU131881	Dengue virus 2 isolate DENV-2/BR/BID-V3644/2008	Brazil	2008	AA	AA5
321	GU131882	Dengue virus 2 isolate DENV-2/BR/BID-V3645/2008	Brazil	2008	AA	AA5
322	GU131883	Dengue virus 2 isolate DENV-2/BR/BID-V3648/2008	Brazil	2008	AA	AA5
323	GU131884	Dengue virus 2 isolate DENV-2/BR/BID-V3650/2008	Brazil	2008	AA	AA5
324	GU131885	Dengue virus 2 isolate DENV-2/BR/BID-V3653/2008	Brazil	2008	AA	AA5
325	HM181971	Dengue virus 2 isolate DENV-2/BR/BID-V3637/2008	Brazil	2008	AA	AA5
326	HQ026763	Dengue virus 2 strain BR0690/RJ/2008	Brazil	2008	AA	AA5
327	JX567950	Dengue virus 2 strain BR0450/2008/RJ/2008	Brazil	2008	AA	AA5
328	JX567951	Dengue virus 2 strain BR0337/2008/RJ/2008	Brazil	2008	AA	AA5
329	AY702037	Dengue virus type 2 strain Cuba89/97	Cuba	1997	AA	AA5
330	AY702039	Dengue virus type 2 strain Cuba205/97	Cuba	1997	AA	AA5
331	AY702034	Dengue virus type 2 strain Cuba13/97	Cuba	NA	AA	AA5
332	AY702035	Dengue virus type 2 strain Cuba58/97	Cuba	NA	AA	AA5
333	AY702036	Dengue virus type 2 strain Cuba115/97	Cuba	NA	AA	AA5
334	AY702038	Dengue virus type 2 strain Cuba165/97	Cuba	NA	AA	AA5
335	AB122020	strain: DR23/01	Dominican Republic	2001	AA	AA5
336	AB122021	strain: DR31/01	Dominican Republic	2001	AA	AA5
337	AB122022	strain: DR59/01	Dominican Republic	2001	AA	AA5
338	FJ898451	Dengue virus 2 isolate DENV-2/DO/BID-V2955/2003	Dominican Republic	2003	AA	AA5
339	GQ199892	Dengue virus 2 isolate DENV-2/JM/BID-V2963/2007	Jamaica	2007	AA	AA5
340	AF208496	Dengue virus type 2 strain DEN2/H/IMTSSA-MART/98-703	Martinique	1998	AA	AA5
341	FJ898460	Dengue virus 2 isolate DENV-2/KN/BID-V2951/2001	Saint Kitts and Nevis	2001	AA	AA5
342	EU687212	Dengue virus 2 isolate DENV-2/US/BID-V1387/1998	USA	1998	AA	AA5
343	EU677145	Dengue virus 2 isolate DENV-2/US/BID-V1428/1999	USA	1999	AA	AA5
344	EU482731	Dengue virus 2 isolate DENV-2/US/BID-V600/2005	USA	2005	AA	AA5
345	EU687216	Dengue virus 2 isolate DENV-2/US/BID-V1439/2005	USA	2005	AA	AA5
346	EU687217	Dengue virus 2 isolate DENV-2/US/BID-V1441/2005	USA	2005	AA	AA5
347	EU482726	Dengue virus 2 isolate DENV-2/US/BID-V595/2006	USA	2006	AA	AA5
348	EU596491	Dengue virus 2 isolate DENV-2/US/BID-V1413/2007	USA	2007	AA	AA5
349	FJ898453	Dengue virus 2 isolate DENV-2/VI/BID-V2960/2005	Virgin Islands	2005	AA	AA5
350	EU482444	Dengue virus 2 isolate DENV-2/NI/BID-V563/2006	Nicaragua	2006	AA	AA6
351	EU482597	Dengue virus 2 isolate DENV-2/NI/BID-V609/2005	Nicaragua	2005	AA	AA6
352	EU482598	Dengue virus 2 isolate DENV-2/NI/BID-V613/2005	Nicaragua	2005	AA	AA6
353	EU482599	Dengue virus 2 isolate DENV-2/NI/BID-V618/2005	Nicaragua	2005	AA	AA6
354	EU482600	Dengue virus 2 isolate DENV-2/NI/BID-V623/2005	Nicaragua	2005	AA	AA6
355	EU482602	Dengue virus 2 isolate DENV-2/NI/BID-V672/2005	Nicaragua	2005	AA	AA6
356	EU482629	Dengue virus 2 isolate DENV-2/NI/BID-V1297/2007	Nicaragua	2007	AA	AA6
357	EU482631	Dengue virus 2 isolate DENV-2/NI/BID-V670/2005	Nicaragua	2005	AA	AA6
358	EU482632	Dengue virus 2 isolate DENV-2/NI/BID-V620/2005	Nicaragua	2005	AA	AA6
359	EU482633	Dengue virus 2 isolate DENV-2/NI/BID-V631/2006	Nicaragua	2006	AA	AA6
360	EU482635	Dengue virus 2 isolate DENV-2/NI/BID-V640/2005	Nicaragua	2005	AA	AA6
361	EU482636	Dengue virus 2 isolate DENV-2/NI/BID-V654/2005	Nicaragua	2005	AA	AA6
362	EU482637	Dengue virus 2 isolate DENV-2/NI/BID-V658/2005	Nicaragua	2005	AA	AA6
363	EU482639	Dengue virus 2 isolate DENV-2/NI/BID-V673/2006	Nicaragua	2006	AA	AA6
364	EU482680	Dengue virus 2 isolate DENV-2/NI/BID-V529/2005	Nicaragua	2005	AA	AA6
365	EU482681	Dengue virus 2 isolate DENV-2/NI/BID-V549/2005	Nicaragua	2005	AA	AA6
366	EU482688	Dengue virus 2 isolate DENV-2/NI/BID-V575/2006	Nicaragua	2006	AA	AA6
367	EU482695	Dengue virus 2 isolate DENV-2/NI/BID-V743/2005	Nicaragua	2005	AA	AA6
368	EU482749	Dengue virus 2 isolate DENV-2/NI/BID-V514/2005	Nicaragua	2005	AA	AA6
369	EU482750	Dengue virus 2 isolate DENV-2/NI/BID-V515/2005	Nicaragua	2005	AA	AA6
370	EU482752	Dengue virus 2 isolate DENV-2/NI/BID-V520/2005	Nicaragua	2005	AA	AA6
371	EU482753	Dengue virus 2 isolate DENV-2/NI/BID-V524/2005	Nicaragua	2005	AA	AA6
372	EU482754	Dengue virus 2 isolate DENV-2/NI/BID-V530/2005	Nicaragua	2005	AA	AA6
373	EU482755	Dengue virus 2 isolate DENV-2/NI/BID-V531/2005	Nicaragua	2005	AA	AA6
374	EU482756	Dengue virus 2 isolate DENV-2/NI/BID-V533/2005	Nicaragua	2005	AA	AA6
375	EU482758	Dengue virus 2 isolate DENV-2/NI/BID-V539/2005	Nicaragua	2005	AA	AA6
376	EU482759	Dengue virus 2 isolate DENV-2/NI/BID-V544/2005	Nicaragua	2005	AA	AA6
377	EU482760	Dengue virus 2 isolate DENV-2/NI/BID-V548/2005	Nicaragua	2005	AA	AA6
378	EU482761	Dengue virus 2 isolate DENV-2/NI/BID-V553/2005	Nicaragua	2005	AA	AA6
379	EU482762	Dengue virus 2 isolate DENV-2/NI/BID-V554/2005	Nicaragua	2005	AA	AA6
380	EU482763	Dengue virus 2 isolate DENV-2/NI/BID-V556/2005	Nicaragua	2005	AA	AA6
381	EU482769	Dengue virus 2 isolate DENV-2/NI/BID-V744/2005	Nicaragua	2005	AA	AA6
382	EU482770	Dengue virus 2 isolate DENV-2/NI/BID-V527/2005	Nicaragua	2005	AA	AA6
383	EU482771	Dengue virus 2 isolate DENV-2/NI/BID-V557/2005	Nicaragua	2005	AA	AA6
384	EU569699	Dengue virus 2 isolate DENV-2/NI/BID-V1217/2007	Nicaragua	2007	AA	AA6
385	EU596484	Dengue virus 2 isolate DENV-2/NI/BID-V660/2005	Nicaragua	2005	AA	AA6
386	FJ226066	Dengue virus 2 isolate DENV-2/NI/BID-V528/2005	Nicaragua	2005	AA	AA6
387	FJ390390	Dengue virus 2 isolate DENV-2/NI/BID-V1298/2007	Nicaragua	2007	AA	AA6
388	FJ410291	Dengue virus 2 isolate DENV-2/NI/BID-V1233/2007	Nicaragua	2007	AA	AA6
389	FJ744704	Dengue virus 2 isolate DENV-2/NI/BID-V2361/2001	Nicaragua	2001	AA	AA6
390	FJ744705	Dengue virus 2 isolate DENV-2/NI/BID-V2363/2000	Nicaragua	2000	AA	AA6
391	FJ744741	Dengue virus 2 isolate DENV-2/NI/BID-V1762/2006	Nicaragua	2006	AA	AA6
392	FJ744744	Dengue virus 2 isolate DENV-2/NI/BID-V2364/2000	Nicaragua	2000	AA	AA6
393	FJ744745	Dengue virus 2 isolate DENV-2/NI/BID-V2362/2000	Nicaragua	2000	AA	AA6
394	FJ850053	Dengue virus 2 isolate DENV-2/NI/BID-V2574/2005	Nicaragua	2005	AA	AA6
395	FJ850054	Dengue virus 2 isolate DENV-2/NI/BID-V2576/2005	Nicaragua	2005	AA	AA6
396	FJ850060	Dengue virus 2 isolate DENV-2/NI/BID-V2344/2000	Nicaragua	2000	AA	AA6
397	FJ850061	Dengue virus 2 isolate DENV-2/NI/BID-V2346/2000	Nicaragua	2000	AA	AA6
398	FJ850062	Dengue virus 2 isolate DENV-2/NI/BID-V2659/2000	Nicaragua	2000	AA	AA6
399	FJ850063	Dengue virus 2 isolate DENV-2/NI/BID-V2660/2000	Nicaragua	2000	AA	AA6
400	FJ850064	Dengue virus 2 isolate DENV-2/NI/BID-V2663/2000	Nicaragua	2000	AA	AA6
401	FJ850065	Dengue virus 2 isolate DENV-2/NI/BID-V2664/2000	Nicaragua	2000	AA	AA6
402	FJ850066	Dengue virus 2 isolate DENV-2/NI/BID-V2665/2000	Nicaragua	2000	AA	AA6
403	FJ850067	Dengue virus 2 isolate DENV-2/NI/BID-V2331/2006	Nicaragua	2006	AA	AA6
404	FJ850115	Dengue virus 2 isolate DENV-2/NI/BID-V634/2005	Nicaragua	2005	AA	AA6
405	FJ850117	Dengue virus 2 isolate DENV-2/NI/BID-V2657/2000	Nicaragua	2000	AA	AA6
406	FJ850118	Dengue virus 2 isolate DENV-2/NI/BID-V2658/2000	Nicaragua	2000	AA	AA6
407	FJ850119	Dengue virus 2 isolate DENV-2/NI/BID-V2662/2000	Nicaragua	2000	AA	AA6
408	FJ850120	Dengue virus 2 isolate DENV-2/NI/BID-V2673/2001	Nicaragua	2001	AA	AA6
409	FJ850121	Dengue virus 2 isolate DENV-2/NI/BID-V2674/2001	Nicaragua	2001	AA	AA6
410	FJ873808	Dengue virus 2 isolate DENV-2/NI/BID-V2666/2000	Nicaragua	2000	AA	AA6
411	FJ882594	Dengue virus 2 isolate DENV-2/NI/BID-V1313/2007	Nicaragua	2007	AA	AA6
412	FJ898435	Dengue virus 2 isolate DENV-2/NI/BID-V648/2005	Nicaragua	2005	AA	AA6
413	FJ898436	Dengue virus 2 isolate DENV-2/NI/BID-V627/2004	Nicaragua	2004	AA	AA6
414	FJ898438	Dengue virus 2 isolate DENV-2/MX/BID-V2953/2002	Mexico	2002	AA	AA6
415	FJ898439	Dengue virus 2 isolate DENV-2/MX/BID-V2964/2008	Mexico	2008	AA	AA6
416	FJ898461	Dengue virus 2 isolate DENV-2/BZ/BID-V2952/2002	Belize	2002	AA	AA6
417	FJ898477	Dengue virus 2 isolate DENV-2/NI/BID-V2923/2000	Nicaragua	2000	AA	AA6
418	FJ898478	Dengue virus 2 isolate DENV-2/NI/BID-V2924/2000	Nicaragua	2000	AA	AA6
419	FJ906956	Dengue virus 2 isolate DENV-2/NI/BID-V543/2005	Nicaragua	2005	AA	AA6
420	FJ906961	Dengue virus 2 isolate DENV-2/NI/BID-V2572/2005	Nicaragua	2005	AA	AA6
421	FJ906962	Dengue virus 2 isolate DENV-2/NI/BID-V2573/2005	Nicaragua	2005	AA	AA6
422	GQ199874	Dengue virus 2 isolate DENV-2/NI/BID-V668/2004	Nicaragua	2004	AA	AA6
423	GQ199893	Dengue virus 2 isolate DENV-2/MX/BID-V2954/2002	Mexico	2002	AA	AA6
424	GQ199894	Dengue virus 2 isolate DENV-2/MX/BID-V2959/2005	Mexico	2005	AA	AA6
425	GQ199895	Dengue virus 2 isolate DENV-2/NI/BID-V2683/1999	Nicaragua	1999	AA	AA6
426	GQ199897	Dengue virus 2 isolate DENV-2/NI/BID-V2675/2002	Nicaragua	2002	AA	AA6
427	GQ199898	Dengue virus 2 isolate DENV-2/NI/BID-V3076/2001	Nicaragua	2001	AA	AA6
428	GQ868497	Dengue virus 2 isolate DENV-2/MX/BID-V3654/2006	Mexico	2006	AA	AA6
429	GQ868515	Dengue virus 2 isolate DENV-2/MX/BID-V3713/2007	Mexico	2007	AA	AA6
430	GQ868516	Dengue virus 2 isolate DENV-2/MX/BID-V3714/2007	Mexico	2007	AA	AA6
431	GQ868646	Dengue virus 2 isolate DENV-2/NI/BID-V2428/2007	Nicaragua	2007	AA	AA6
432	GU131955	Dengue virus 2 isolate DENV-2/MX/BID-V3768/2004	Mexico	2004	AA	AA6
433	GU131959	Dengue virus 2 isolate DENV-2/MX/BID-V3661/2006	Mexico	2006	AA	AA6
434	GU131974	Dengue virus 2 isolate DENV-2/MX/BID-V3715/2007	Mexico	2007	AA	AA6
435	GU131975	Dengue virus 2 isolate DENV-2/MX/BID-V3717/2007	Mexico	2007	AA	AA6
436	GU369819	Dengue virus 2 isolate CAM7786	Mexico	2002	AA	AA6
437	HM631868	Dengue virus 2 isolate DENV-2/NI/BID-V4159/2005	Nicaragua	2005	AA	AA6
438	HQ541788	Dengue virus 2 isolate DENV-2/NI/BID-V3149/2007	Nicaragua	2007	AA	AA6
439	HQ541793	Dengue virus 2 isolate DENV-2/NI/BID-V4636/2005	Nicaragua	2005	AA	AA6
440	HQ541794	Dengue virus 2 isolate DENV-2/NI/BID-V4639/2005	Nicaragua	2005	AA	AA6
441	HQ705624	Dengue virus 2 isolate DENV-2/NI/BID-V4914/2009	Nicaragua	2009	AA	AA6
442	JN819416	Dengue virus 2 isolate DENV-2/NI/BID-V2661/2000	Nicaragua	2000	AA	AA6
443	JN819422	Dengue virus 2 isolate DENV-2/MX/BID-V3763/2008	Mexico	2008	AA	AA6
444	JX079694	Dengue virus 2 isolate DENV-2/NI/BID-V4637/2005	Nicaragua	2005	AA	AA6
445	EU482601	Dengue virus 2 isolate DENV-2/NI/BID-V663/2007	Nicaragua	2007	AA	AA7
446	EU482603	Dengue virus 2 isolate DENV-2/NI/BID-V615/2007	Nicaragua	2007	AA	AA7
447	EU482620	Dengue virus 2 isolate DENV-2/NI/BID-V1074/2006	Nicaragua	2006	AA	AA7
448	EU482621	Dengue virus 2 isolate DENV-2/NI/BID-V1191/2007	Nicaragua	2007	AA	AA7
449	EU482622	Dengue virus 2 isolate DENV-2/NI/BID-V1198/2007	Nicaragua	2007	AA	AA7
450	EU482623	Dengue virus 2 isolate DENV-2/NI/BID-V1210/2007	Nicaragua	2007	AA	AA7
451	EU482624	Dengue virus 2 isolate DENV-2/NI/BID-V1229/2007	Nicaragua	2007	AA	AA7
452	EU482625	Dengue virus 2 isolate DENV-2/NI/BID-V1232/2007	Nicaragua	2007	AA	AA7
453	EU482626	Dengue virus 2 isolate DENV-2/NI/BID-V1234/2007	Nicaragua	2007	AA	AA7
454	EU482627	Dengue virus 2 isolate DENV-2/NI/BID-V1235/2007	Nicaragua	2007	AA	AA7
455	EU482628	Dengue virus 2 isolate DENV-2/NI/BID-V1236/2007	Nicaragua	2007	AA	AA7
456	EU482630	Dengue virus 2 isolate DENV-2/NI/BID-V1312/2007	Nicaragua	2007	AA	AA7
457	EU482634	Dengue virus 2 isolate DENV-2/NI/BID-V633/2006	Nicaragua	2006	AA	AA7
458	EU482638	Dengue virus 2 isolate DENV-2/NI/BID-V662/2007	Nicaragua	2007	AA	AA7
459	EU482682	Dengue virus 2 isolate DENV-2/NI/BID-V559/2006	Nicaragua	2006	AA	AA7
460	EU482683	Dengue virus 2 isolate DENV-2/NI/BID-V570/2006	Nicaragua	2006	AA	AA7
461	EU482684	Dengue virus 2 isolate DENV-2/NI/BID-V571/2006	Nicaragua	2006	AA	AA7
462	EU482685	Dengue virus 2 isolate DENV-2/NI/BID-V572/2006	Nicaragua	2006	AA	AA7
463	EU482686	Dengue virus 2 isolate DENV-2/NI/BID-V573/2006	Nicaragua	2006	AA	AA7
464	EU482687	Dengue virus 2 isolate DENV-2/NI/BID-V574/2006	Nicaragua	2006	AA	AA7
465	EU482689	Dengue virus 2 isolate DENV-2/NI/BID-V576/2006	Nicaragua	2006	AA	AA7
466	EU482690	Dengue virus 2 isolate DENV-2/NI/BID-V578/2006	Nicaragua	2006	AA	AA7
467	EU482691	Dengue virus 2 isolate DENV-2/NI/BID-V579/2006	Nicaragua	2006	AA	AA7
468	EU482692	Dengue virus 2 isolate DENV-2/NI/BID-V580/2006	Nicaragua	2006	AA	AA7
469	EU482693	Dengue virus 2 isolate DENV-2/NI/BID-V581/2006	Nicaragua	2006	AA	AA7
470	EU482694	Dengue virus 2 isolate DENV-2/NI/BID-V582/2007	Nicaragua	2007	AA	AA7
471	EU482696	Dengue virus 2 isolate DENV-2/NI/BID-V747/2006	Nicaragua	2006	AA	AA7
472	EU482748	Dengue virus 2 isolate DENV-2/NI/BID-V513/2005	Nicaragua	2005	AA	AA7
473	EU482751	Dengue virus 2 isolate DENV-2/NI/BID-V517/2005	Nicaragua	2005	AA	AA7
474	EU482757	Dengue virus 2 isolate DENV-2/NI/BID-V535/2005	Nicaragua	2005	AA	AA7
475	EU482766	Dengue virus 2 isolate DENV-2/NI/BID-V693/2005	Nicaragua	2005	AA	AA7
476	EU482772	Dengue virus 2 isolate DENV-2/NI/BID-V565/2006	Nicaragua	2006	AA	AA7
477	EU482773	Dengue virus 2 isolate DENV-2/NI/BID-V566/2006	Nicaragua	2006	AA	AA7
478	EU569692	Dengue virus 2 isolate DENV-2/NI/BID-V1192/2007	Nicaragua	2007	AA	AA7
479	EU569693	Dengue virus 2 isolate DENV-2/NI/BID-V1193/2007	Nicaragua	2007	AA	AA7
480	EU569694	Dengue virus 2 isolate DENV-2/NI/BID-V1199/2007	Nicaragua	2007	AA	AA7
481	EU569695	Dengue virus 2 isolate DENV-2/NI/BID-V1203/2007	Nicaragua	2007	AA	AA7
482	EU569696	Dengue virus 2 isolate DENV-2/NI/BID-V1206/2007	Nicaragua	2007	AA	AA7
483	EU569697	Dengue virus 2 isolate DENV-2/NI/BID-V1208/2007	Nicaragua	2007	AA	AA7
484	EU569698	Dengue virus 2 isolate DENV-2/NI/BID-V1212/2007	Nicaragua	2007	AA	AA7
485	EU569700	Dengue virus 2 isolate DENV-2/NI/BID-V1219/2007	Nicaragua	2007	AA	AA7
486	EU569701	Dengue virus 2 isolate DENV-2/NI/BID-V1224/2007	Nicaragua	2007	AA	AA7
487	EU569702	Dengue virus 2 isolate DENV-2/NI/BID-V1228/2007	Nicaragua	2007	AA	AA7
488	EU596483	Dengue virus 2 isolate DENV-2/NI/BID-V608/2006	Nicaragua	2006	AA	AA7
489	EU596495	Dengue virus 2 isolate DENV-2/NI/BID-V1195/2007	Nicaragua	2007	AA	AA7
490	EU596496	Dengue virus 2 isolate DENV-2/NI/BID-V1200/2007	Nicaragua	2007	AA	AA7
491	EU596497	Dengue virus 2 isolate DENV-2/NI/BID-V1202/2007	Nicaragua	2007	AA	AA7
492	EU596498	Dengue virus 2 isolate DENV-2/NI/BID-V1211/2007	Nicaragua	2007	AA	AA7
493	EU596499	Dengue virus 2 isolate DENV-2/NI/BID-V1215/2007	Nicaragua	2007	AA	AA7
494	EU596500	Dengue virus 2 isolate DENV-2/NI/BID-V1230/2007	Nicaragua	2007	AA	AA7
495	EU621672	Dengue virus 2 isolate DENV-2/NI/BID-V1225/2007	Nicaragua	2007	AA	AA7
496	EU660404	Dengue virus 2 isolate DENV-2/NI/BID-V1196/2007	Nicaragua	2007	AA	AA7
497	EU660405	Dengue virus 2 isolate DENV-2/NI/BID-V1201/2007	Nicaragua	2007	AA	AA7
498	EU660406	Dengue virus 2 isolate DENV-2/NI/BID-V1207/2007	Nicaragua	2007	AA	AA7
499	FJ182014	Dengue virus 2 isolate DENV-2/NI/BID-V1303/2007	Nicaragua	2007	AA	AA7
500	FJ205885	Dengue virus 2 isolate DENV-2/NI/BID-V1721/2008	Nicaragua	2008	AA	AA7
501	FJ373300	Dengue virus 2 isolate DENV-2/NI/BID-V1194/2007	Nicaragua	2007	AA	AA7
502	FJ373301	Dengue virus 2 isolate DENV-2/NI/BID-V1205/2007	Nicaragua	2007	AA	AA7
503	FJ390391	Dengue virus 2 isolate DENV-2/NI/BID-V1300/2007	Nicaragua	2007	AA	AA7
504	FJ478455	Dengue virus 2 isolate DENV-2/NI/BID-V532/2005	Nicaragua	2005	AA	AA7
505	FJ478459	Dengue virus 2 isolate DENV-2/NI/BID-V1214/2007	Nicaragua	2007	AA	AA7
506	FJ547090	Dengue virus 2 isolate DENV-2/NI/BID-V1311/2007	Nicaragua	2007	AA	AA7
507	FJ639833	Dengue virus 2 isolate DENV-2/NI/BID-V1237/2007	Nicaragua	2007	AA	AA7
508	FJ639834	Dengue virus 2 isolate DENV-2/NI/BID-V2354/2007	Nicaragua	2007	AA	AA7
509	FJ639835	Dengue virus 2 isolate DENV-2/NI/BID-V2355/2007	Nicaragua	2007	AA	AA7
510	FJ639836	Dengue virus 2 isolate DENV-2/NI/BID-V2357/2007	Nicaragua	2007	AA	AA7
511	FJ639837	Dengue virus 2 isolate DENV-2/NI/BID-V2358/2007	Nicaragua	2007	AA	AA7
512	FJ744703	Dengue virus 2 isolate DENV-2/NI/BID-V1764/2007	Nicaragua	2007	AA	AA7
513	FJ744706	Dengue virus 2 isolate DENV-2/NI/BID-V2359/2007	Nicaragua	2007	AA	AA7
514	FJ744707	Dengue virus 2 isolate DENV-2/NI/BID-V2360/2007	Nicaragua	2007	AA	AA7
515	FJ744708	Dengue virus 2 isolate DENV-2/NI/BID-V2352/2007	Nicaragua	2007	AA	AA7
516	FJ744709	Dengue virus 2 isolate DENV-2/NI/BID-V2351/2008	Nicaragua	2008	AA	AA7
517	FJ744742	Dengue virus 2 isolate DENV-2/NI/BID-V1763/2006	Nicaragua	2006	AA	AA7
518	FJ744743	Dengue virus 2 isolate DENV-2/NI/BID-V1755/2007	Nicaragua	2007	AA	AA7
519	FJ810418	Dengue virus 2 isolate DENV-2/NI/BID-V2353/2008	Nicaragua	2008	AA	AA7
520	FJ850050	Dengue virus 2 isolate DENV-2/NI/BID-V2356/2007	Nicaragua	2007	AA	AA7
521	FJ850051	Dengue virus 2 isolate DENV-2/NI/BID-V2635/2007	Nicaragua	2007	AA	AA7
522	FJ850116	Dengue virus 2 isolate DENV-2/NI/BID-V1197/2007	Nicaragua	2007	AA	AA7
523	FJ882593	Dengue virus 2 isolate DENV-2/NI/BID-V1302/2007	Nicaragua	2007	AA	AA7
524	FJ898432	Dengue virus 2 isolate DENV-2/NI/BID-V1304/2007	Nicaragua	2007	AA	AA7
525	FJ898434	Dengue virus 2 isolate DENV-2/NI/BID-V2920/2007	Nicaragua	2007	AA	AA7
526	FJ898479	Dengue virus 2 isolate DENV-2/NI/BID-V2922/2007	Nicaragua	2007	AA	AA7
527	FJ906960	Dengue virus 2 isolate DENV-2/NI/BID-V2569/2007	Nicaragua	2007	AA	AA7
528	GQ199866	Dengue virus 2 isolate DENV-2/NI/BID-V2427/2007	Nicaragua	2007	AA	AA7
529	GQ199868	Dengue virus 2 isolate DENV-2/NI/BID-V2996/2007	Nicaragua	2007	AA	AA7
530	GQ199869	Dengue virus 2 isolate DENV-2/NI/BID-V3002/2007	Nicaragua	2007	AA	AA7
531	GQ199896	Dengue virus 2 isolate DENV-2/NI/BID-V2680/2006	Nicaragua	2006	AA	AA7
532	GQ868604	Dengue virus 2 isolate DENV-2/NI/BID-V518/2005	Nicaragua	2005	AA	AA7
533	HM631865	Dengue virus 2 isolate DENV-2/NI/BID-V4156/2007	Nicaragua	2007	AA	AA7
534	HM631866	Dengue virus 2 isolate DENV-2/NI/BID-V4157/2006	Nicaragua	2006	AA	AA7
535	HM631867	Dengue virus 2 isolate DENV-2/NI/BID-V4158/2006	Nicaragua	2006	AA	AA7
536	HQ541786	Dengue virus 2 isolate DENV-2/NI/BID-V2596/2006	Nicaragua	2006	AA	AA7
537	HQ541787	Dengue virus 2 isolate DENV-2/NI/BID-V3136/2007	Nicaragua	2007	AA	AA7
538	HQ541792	Dengue virus 2 isolate DENV-2/NI/BID-V3223/2008	Nicaragua	2008	AA	AA7
539	HQ634199	Dengue virus 2 isolate DENV-2/NI/BID-V3143/2007	Nicaragua	2007	AA	AA7
540	HQ705625	Dengue virus 2 isolate DENV-2/NI/BID-V4915/2009	Nicaragua	2009	AA	AA7
541	HQ733861	Dengue virus 2 isolate DENV-2/NI/BID-V2599/2006	Nicaragua	2006	AA	AA7
542	HQ999999	Dengue virus 2 isolate DENV-2/GU/FDA-GUA09/2009	Guatemala	2009	AA	AA7
543	JF357905	Dengue virus 2 isolate DENV-2/NI/BID-V2605/2007	Nicaragua	2007	AA	AA7
544	JF357906	Dengue virus 2 isolate DENV-2/NI/BID-V3227/2008	Nicaragua	2008	AA	AA7
545	JF357907	Dengue virus 2 isolate DENV-2/NI/BID-V4650/2007	Nicaragua	2007	AA	AA7
546	JF730051	Dengue virus 2 isolate DENV-2/NI/BID-V5072/2009	Nicaragua	2009	AA	AA7
547	JF730052	Dengue virus 2 isolate DENV-2/NI/BID-V5073/2009	Nicaragua	2009	AA	AA7
548	JN819420	Dengue virus 2 isolate DENV-2/NI/BID-V2639/2007	Nicaragua	2007	AA	AA7
549	JN819421	Dengue virus 2 isolate DENV-2/NI/BID-V2997/2007	Nicaragua	2007	AA	AA7
550	JN819424	Dengue virus 2 isolate DENV-2/NI/BID-V1761/2006	Nicaragua	2006	AA	AA7
551	JX079688	Dengue virus 2 isolate DENV-2/NI/BID-V3152/2008	Nicaragua	2008	AA	AA7
552	JX079690	Dengue virus 2 isolate DENV-2/NI/BID-V3232/2007	Nicaragua	2007	AA	AA7
553	GQ398264	Dengue virus 2 strain DENV-2/ID/1046DN/1976	Indonesia	1976	C	C2
554	FJ196854	Dengue virus 2 isolate GD06/93	China	1993	C	C2
555	AB189122	strain 98900663 DHF DV-2	Indonesia	1998	C	C2
556	AB189123	strain 98900665 DF DV-2	Indonesia	1998	C	C2
557	AB189124	strain 98900666 DSS DV-2	Indonesia	1998	C	C2
558	HM488257	Dengue virus 2 isolate DENV-2/GU/BID-V2950/2001	Guam	2001	C	C2
559	FJ196852	Dengue virus 2 isolate GD01/01	China	2001	C	C2
560	DQ645543	Dengue virus type 2 strain 1018-DF-12/03/2001	Taiwan	2001	C	C2
561	DQ645544	Dengue virus type 2 strain 1024-DHF-12/07/2001	Taiwan	2001	C	C2
562	DQ645540	Dengue virus type 2 strain 904-DHF-10/31/2001	Taiwan	2001	C	C2
563	DQ645541	Dengue virus type 2 strain 915-DF-11/03/2001	Taiwan	2001	C	C2
564	DQ645542	Dengue virus type 2 strain 950-DF-11/12/2001	Taiwan	2001	C	C2
565	EF051521	Dengue virus type 2 strain ZS01/01	China	2001	C	C2
566	DQ645545	Dengue virus type 2 strain 1183-DF-06/17/2002	Taiwan	2002	C	C2
567	DQ645546	Dengue virus type 2 strain 1222-DF-06/24/2002	Taiwan	2002	C	C2
568	DQ645547	Dengue virus type 2 strain 1421-DF-07/16/2002	Taiwan	2002	C	C2
569	DQ645548	Dengue virus type 2 strain 1464-DHF-07/20/2002	Taiwan	2002	C	C2
570	DQ645549	Dengue virus type 2 strain 1945-DHF-08/18/2002	Taiwan	2002	C	C2
571	DQ645550	Dengue virus type 2 strain 1949-DF-08/19/2002	Taiwan	2002	C	C2
572	DQ645551	Dengue virus type 2 strain 2191-DF-09/12/2002	Taiwan	2002	C	C2
573	DQ645552	Dengue virus type 2 strain 2208-DHF-09/13/2002	Taiwan	2002	C	C2
574	DQ645553	Dengue virus type 2 strain 2559-DHF-10/23/2002	Taiwan	2002	C	C2
575	DQ645554	Dengue virus type 2 strain 2587-DF-10/26/2002	Taiwan	2002	C	C2
576	DQ645555	Dengue virus type 2 strain 2659-DHF-11/01/2002	Taiwan	2002	C	C2
577	DQ645556	Dengue virus type 2 strain 2784-DF-11/18/2002	Taiwan	2002	C	C2
578	FJ196853	Dengue virus 2 isolate GD01/03	China	2003	C	C2
579	JN851123	Dengue virus 2 isolate SGEHI(D2)0377Y04	Singapore	2004	C	C2
580	JN851127	Dengue virus 2 isolate SGEHI(D2)0685Y04	Singapore	2004	C	C2
581	JN851130	Dengue virus 2 isolate SGEHI(D2)0270Y05	Singapore	2005	C	C2
582	JN851125	Dengue virus 2 isolate SGEHI(D2)0345Y05	Singapore	2005	C	C2
583	JN851124	Dengue virus 2 isolate SGEHI(D2)0462Y05	Singapore	2005	C	C2
584	JN851126	Dengue virus 2 isolate SGEHI(D2)0578Y05	Singapore	2005	C	C2
585	JN851131	Dengue virus 2 isolate SGEHI(D2)0762Y05	Singapore	2005	C	C2
586	EU179858	Dengue virus type 2 isolate DS04-221205	Brunei	2005	C	C2
587	EU179857	Dengue virus type 2 isolate DS31-291005	Brunei	2005	C	C2
588	EU081177	Dengue virus type 2 strain D2/SG/05K3295DK1/2005	Singapore	2005	C	C2
589	EU081178	Dengue virus type 2 strain D2/SG/05K3330DK1/2005	Singapore	2005	C	C2
590	EU081179	Dengue virus type 2 strain D2/SG/05K4137DK1/2005	Singapore	2005	C	C2
591	EU081180	Dengue virus type 2 strain D2/SG/05K4155DK1/2005	Singapore	2005	C	C2
592	EU482640	Dengue virus 2 isolate DENV-2/VN/BID-V703/2006	Viet Nam	2006	C	C2
593	EU482672	Dengue virus 2 isolate DENV-2/VN/BID-V735/2006	Viet Nam	2006	C	C2
594	JN851113	Dengue virus 2 isolate SGEHI(D2)0017Y06	Singapore	2006	C	C2
595	JN851129	Dengue virus 2 isolate SGEHI(D2)0204Y06	Singapore	2006	C	C2
596	JN851128	Dengue virus 2 isolate SGEHI(D2)0232Y06	Singapore	2006	C	C2
597	EU179859	Dengue virus type 2 isolate DS09-280106	Brunei	2006	C	C2
598	GU370050	Dengue virus 2 isolate SGEHI(D2)0099Y07	Singapore	2007	C	C2
599	JN851117	Dengue virus 2 isolate SGEHI(D2)0431Y07	Singapore	2007	C	C2
600	JN851114	Dengue virus 2 isolate SGEHI(D2)0522Y07	Singapore	2007	C	C2
601	JN851115	Dengue virus 2 isolate SGEHI(D2)0642Y07	Singapore	2007	C	C2
602	JN851120	Dengue virus 2 isolate SGEHI(D2)0722Y07	Singapore	2007	C	C2
603	JN851116	Dengue virus 2 isolate SGEHI(D2)1079Y07	Singapore	2007	C	C2
604	GQ398267	Dengue virus 2 strain DENV-2/SG/07K3588DK1/2007	Singapore	2007	C	C2
605	GQ398266	Dengue virus 2 strain DENV-2/SG/07K3598DK2/2007	Singapore	2007	C	C2
606	JN851119	Dengue virus 2 isolate SGEHI(D2)0194Y08	Singapore	2008	C	C2
607	JN851118	Dengue virus 2 isolate SGEHI(D2)0391Y08	Singapore	2008	C	C2
608	JN851121	Dengue virus 2 isolate SGEHI(D2)0615Y08	Singapore	2008	C	C2
609	JN851122	Dengue virus 2 isolate SGEHI(D2)0950Y08	Singapore	2008	C	C2
610	GU370051	Dengue virus 2 isolate SGEHI(D2)1158Y08	Singapore	2008	C	C2
611	GQ398265	Dengue virus 2 strain DENV-2/SG/07K3608DK1/2008	Singapore	2008	C	C2
612	JF327392	Dengue virus 2 strain DENV-2/SG/D2Y98P-PP1/2009	Singapore	2009	C	C2
613	JX470186	Dengue virus 2 isolate GZ40	China	2010	C	C2
614	KC131142	Dengue virus 2 isolate ZH413-2	China	2012	C	C2
615	EU359009	Dengue virus 2 isolate ZH1340	China	NA	C	C2
616	AY858035	Dengue virus 2 strain BA05i	Indonesia	NA	C	C2
617	AY858036	Dengue virus 2 strain TB16i	Indonesia	NA	C	C2
618	AY037116	Dengue virus type 2 strain TSV01	Australia	NA	C	C2
619	AY776328	Dengue virus type 2 strain Taiwan-1008DHF	Taiwan	NA	C	C2
620	GQ398258	Dengue virus 2 strain DENV-2/ID/1016DN/1975	Indonesia	1975	C	C1
621	GQ398263	Dengue virus 2 strain DENV-2/ID/1023DN/1975	Indonesia	1975	C	C1
622	GQ398259	Dengue virus 2 strain DENV-2/ID/1017DN/1976	Indonesia	1976	C	C1
623	GQ398260	Dengue virus 2 strain DENV-2/ID/1070DN/1976	Indonesia	1976	C	C1
624	GQ398261	Dengue virus 2 strain DENV-2/ID/1172DN/1976	Indonesia	1976	C	C1
625	GQ398262	Dengue virus 2 strain DENV-2/ID/1127DN/1976	Indonesia	1976	C	C1
626	EU056810	Dengue virus type 2 isolate 1349	Burkina Faso	1983	C	C1
627	GU131843	Dengue virus 2 isolate DENV-2/BF/BID-V3502/1986	Burkina Faso	1986	C	C1
628	FJ882602	Dengue virus 2 isolate DENV-2/LK/BID-V2416/1996	Sri Lanka	1996	C	C1
629	JQ922549	Dengue virus 2 isolate DENV-2/IND/969201/1996	India	1996	C	C1
630	DQ448231	Dengue virus 2 isolate GWL18 INDI-01	India	2001	C	C1
631	GQ252676	Dengue virus 2 isolate DENV-2/LK/BID-V2421/2003	Sri Lanka	2003	C	C1
632	GQ252677	Dengue virus 2 isolate DENV-2/LK/BID-V2422/2004	Sri Lanka	2004	C	C1
633	JQ922551	Dengue virus 2 isolate DENV-2/IND/053598/2005	India	2005	C	C1
634	FJ898454	Dengue virus 2 isolate DENV-2/IN/BID-V2961/2006	India	2006	C	C1
635	AF276619	Dengue virus type 2 strain FJ-10	China	NA	C	C1
636	AF359579	Dengue virus type 2 strain FJ11/99	NA	NA	C	C1
637	DQ181797	Dengue virus type 2 strain ThD2_0078_01	Thailand	2001	AI	AI-2
638	EU482445	Dengue virus 2 isolate DENV-2/VN/BID-V1000/2006	Viet Nam	2006	AI	AI-2
639	EU482446	Dengue virus 2 isolate DENV-2/VN/BID-V1001/2006	Viet Nam	2006	AI	AI-2
640	EU482447	Dengue virus 2 isolate DENV-2/VN/BID-V1002/2006	Viet Nam	2006	AI	AI-2
641	EU482448	Dengue virus 2 isolate DENV-2/VN/BID-V1003/2006	Viet Nam	2006	AI	AI-2
642	EU482450	Dengue virus 2 isolate DENV-2/VN/BID-V1005/2006	Viet Nam	2006	AI	AI-2
643	EU482451	Dengue virus 2 isolate DENV-2/VN/BID-V1007/2006	Viet Nam	2006	AI	AI-2
644	EU482463	Dengue virus 2 isolate DENV-2/VN/BID-V917/2006	Viet Nam	2006	AI	AI-2
645	EU482464	Dengue virus 2 isolate DENV-2/VN/BID-V918/2006	Viet Nam	2006	AI	AI-2
646	EU482465	Dengue virus 2 isolate DENV-2/VN/BID-V919/2006	Viet Nam	2006	AI	AI-2
647	EU482466	Dengue virus 2 isolate DENV-2/VN/BID-V920/2006	Viet Nam	2006	AI	AI-2
648	EU482467	Dengue virus 2 isolate DENV-2/VN/BID-V921/2006	Viet Nam	2006	AI	AI-2
649	EU482468	Dengue virus 2 isolate DENV-2/VN/BID-V923/2006	Viet Nam	2006	AI	AI-2
650	EU482469	Dengue virus 2 isolate DENV-2/VN/BID-V924/2006	Viet Nam	2006	AI	AI-2
651	EU482470	Dengue virus 2 isolate DENV-2/VN/BID-V925/2006	Viet Nam	2006	AI	AI-2
652	EU482471	Dengue virus 2 isolate DENV-2/VN/BID-V926/2006	Viet Nam	2006	AI	AI-2
653	EU482472	Dengue virus 2 isolate DENV-2/VN/BID-V927/2004	Viet Nam	2004	AI	AI-2
654	EU482473	Dengue virus 2 isolate DENV-2/VN/BID-V928/2006	Viet Nam	2006	AI	AI-2
655	EU482474	Dengue virus 2 isolate DENV-2/VN/BID-V929/2007	Viet Nam	2007	AI	AI-2
656	EU482475	Dengue virus 2 isolate DENV-2/VN/BID-V930/2007	Viet Nam	2007	AI	AI-2
657	EU482541	Dengue virus 2 isolate DENV-2/VN/BID-V997/2006	Viet Nam	2006	AI	AI-2
658	EU482542	Dengue virus 2 isolate DENV-2/VN/BID-V998/2006	Viet Nam	2006	AI	AI-2
659	EU482543	Dengue virus 2 isolate DENV-2/VN/BID-V999/2006	Viet Nam	2006	AI	AI-2
660	EU482641	Dengue virus 2 isolate DENV-2/VN/BID-V704/2006	Viet Nam	2006	AI	AI-2
661	EU482642	Dengue virus 2 isolate DENV-2/VN/BID-V705/2006	Viet Nam	2006	AI	AI-2
662	EU482643	Dengue virus 2 isolate DENV-2/VN/BID-V706/2006	Viet Nam	2006	AI	AI-2
663	EU482644	Dengue virus 2 isolate DENV-2/VN/BID-V707/2006	Viet Nam	2006	AI	AI-2
664	EU482645	Dengue virus 2 isolate DENV-2/VN/BID-V708/2006	Viet Nam	2006	AI	AI-2
665	EU482646	Dengue virus 2 isolate DENV-2/VN/BID-V709/2006	Viet Nam	2006	AI	AI-2
666	EU482647	Dengue virus 2 isolate DENV-2/VN/BID-V710/2006	Viet Nam	2006	AI	AI-2
667	EU482649	Dengue virus 2 isolate DENV-2/VN/BID-V712/2006	Viet Nam	2006	AI	AI-2
668	EU482650	Dengue virus 2 isolate DENV-2/VN/BID-V713/2006	Viet Nam	2006	AI	AI-2
669	EU482651	Dengue virus 2 isolate DENV-2/VN/BID-V714/2006	Viet Nam	2006	AI	AI-2
670	EU482652	Dengue virus 2 isolate DENV-2/VN/BID-V715/2006	Viet Nam	2006	AI	AI-2
671	EU482653	Dengue virus 2 isolate DENV-2/VN/BID-V716/2006	Viet Nam	2006	AI	AI-2
672	EU482654	Dengue virus 2 isolate DENV-2/VN/BID-V717/2006	Viet Nam	2006	AI	AI-2
673	EU482655	Dengue virus 2 isolate DENV-2/VN/BID-V718/2006	Viet Nam	2006	AI	AI-2
674	EU482656	Dengue virus 2 isolate DENV-2/VN/BID-V719/2006	Viet Nam	2006	AI	AI-2
675	EU482657	Dengue virus 2 isolate DENV-2/VN/BID-V720/2006	Viet Nam	2006	AI	AI-2
676	EU482658	Dengue virus 2 isolate DENV-2/VN/BID-V721/2006	Viet Nam	2006	AI	AI-2
677	EU482659	Dengue virus 2 isolate DENV-2/VN/BID-V722/2006	Viet Nam	2006	AI	AI-2
678	EU482661	Dengue virus 2 isolate DENV-2/VN/BID-V724/2006	Viet Nam	2006	AI	AI-2
679	EU482663	Dengue virus 2 isolate DENV-2/VN/BID-V726/2006	Viet Nam	2006	AI	AI-2
680	EU482665	Dengue virus 2 isolate DENV-2/VN/BID-V728/2006	Viet Nam	2006	AI	AI-2
681	EU482667	Dengue virus 2 isolate DENV-2/VN/BID-V730/2006	Viet Nam	2006	AI	AI-2
682	EU482668	Dengue virus 2 isolate DENV-2/VN/BID-V731/2006	Viet Nam	2006	AI	AI-2
683	EU482669	Dengue virus 2 isolate DENV-2/VN/BID-V732/2006	Viet Nam	2006	AI	AI-2
684	EU482670	Dengue virus 2 isolate DENV-2/VN/BID-V733/2006	Viet Nam	2006	AI	AI-2
685	EU482671	Dengue virus 2 isolate DENV-2/VN/BID-V734/2006	Viet Nam	2006	AI	AI-2
686	EU482673	Dengue virus 2 isolate DENV-2/VN/BID-V736/2006	Viet Nam	2006	AI	AI-2
687	EU482674	Dengue virus 2 isolate DENV-2/VN/BID-V737/2006	Viet Nam	2006	AI	AI-2
688	EU482675	Dengue virus 2 isolate DENV-2/VN/BID-V738/2006	Viet Nam	2006	AI	AI-2
689	EU482676	Dengue virus 2 isolate DENV-2/VN/BID-V739/2006	Viet Nam	2006	AI	AI-2
690	EU482677	Dengue virus 2 isolate DENV-2/VN/BID-V740/2006	Viet Nam	2006	AI	AI-2
691	EU482678	Dengue virus 2 isolate DENV-2/VN/BID-V741/2006	Viet Nam	2006	AI	AI-2
692	EU482679	Dengue virus 2 isolate DENV-2/VN/BID-V742/2007	Viet Nam	2007	AI	AI-2
693	EU482697	Dengue virus 2 isolate DENV-2/VN/BID-V771/2007	Viet Nam	2007	AI	AI-2
694	EU482698	Dengue virus 2 isolate DENV-2/VN/BID-V772/2007	Viet Nam	2007	AI	AI-2
695	EU482699	Dengue virus 2 isolate DENV-2/VN/BID-V773/2007	Viet Nam	2007	AI	AI-2
696	EU482700	Dengue virus 2 isolate DENV-2/VN/BID-V774/2007	Viet Nam	2007	AI	AI-2
697	EU482701	Dengue virus 2 isolate DENV-2/VN/BID-V775/2007	Viet Nam	2007	AI	AI-2
698	EU482702	Dengue virus 2 isolate DENV-2/VN/BID-V776/2007	Viet Nam	2007	AI	AI-2
699	EU482703	Dengue virus 2 isolate DENV-2/VN/BID-V777/2007	Viet Nam	2007	AI	AI-2
700	EU482704	Dengue virus 2 isolate DENV-2/VN/BID-V778/2007	Viet Nam	2007	AI	AI-2
701	EU482705	Dengue virus 2 isolate DENV-2/VN/BID-V779/2007	Viet Nam	2007	AI	AI-2
702	EU482774	Dengue virus 2 isolate DENV-2/VN/BID-V752/2004	Viet Nam	2004	AI	AI-2
703	EU482775	Dengue virus 2 isolate DENV-2/VN/BID-V753/2004	Viet Nam	2004	AI	AI-2
704	EU482776	Dengue virus 2 isolate DENV-2/VN/BID-V754/2005	Viet Nam	2005	AI	AI-2
705	EU482777	Dengue virus 2 isolate DENV-2/VN/BID-V755/2005	Viet Nam	2005	AI	AI-2
706	EU482782	Dengue virus 2 isolate DENV-2/VN/BID-V760/2003	Viet Nam	2003	AI	AI-2
707	EU482784	Dengue virus 2 isolate DENV-2/VN/BID-V762/2003	Viet Nam	2003	AI	AI-2
708	EU482786	Dengue virus 2 isolate DENV-2/VN/BID-V764/2003	Viet Nam	2003	AI	AI-2
709	EU569721	Dengue virus 2 isolate DENV-2/VN/BID-V1006/2006	Viet Nam	2006	AI	AI-2
710	EU660413	Dengue virus 2 isolate DENV-2/VN/BID-V1507/2007	Viet Nam	2007	AI	AI-2
711	EU660414	Dengue virus 2 isolate DENV-2/VN/BID-V1508/2007	Viet Nam	2007	AI	AI-2
712	EU660415	Dengue virus 2 isolate DENV-2/VN/BID-V1511/2007	Viet Nam	2007	AI	AI-2
713	EU660416	Dengue virus 2 isolate DENV-2/VN/BID-V1513/2007	Viet Nam	2007	AI	AI-2
714	EU660417	Dengue virus 2 isolate DENV-2/VN/BID-V1515/2007	Viet Nam	2007	AI	AI-2
715	EU677137	Dengue virus 2 isolate DENV-2/VN/BID-V1517/2007	Viet Nam	2007	AI	AI-2
716	EU677138	Dengue virus 2 isolate DENV-2/VN/BID-V1518/2007	Viet Nam	2007	AI	AI-2
717	EU677148	Dengue virus 2 isolate DENV-2/VN/BID-V1519/2007	Viet Nam	2007	AI	AI-2
718	EU677149	Dengue virus 2 isolate DENV-2/VN/BID-V1520/2007	Viet Nam	2007	AI	AI-2
719	EU687248	Dengue virus 2 isolate DENV-2/VN/BID-V1509/2007	Viet Nam	2007	AI	AI-2
720	EU687249	Dengue virus 2 isolate DENV-2/VN/BID-V1512/2007	Viet Nam	2007	AI	AI-2
721	EU687250	Dengue virus 2 isolate DENV-2/VN/BID-V1522/2007	Viet Nam	2007	AI	AI-2
722	EU726776	Dengue virus 2 isolate DENV-2/VN/BID-V1514/2007	Viet Nam	2007	AI	AI-2
723	FJ024452	Dengue virus 2 isolate DENV-2/VN/BID-V1669/2007	Viet Nam	2007	AI	AI-2
724	FJ024454	Dengue virus 2 isolate DENV-2/VN/BID-V1675/2007	Viet Nam	2007	AI	AI-2
725	FJ024458	Dengue virus 2 isolate DENV-2/VN/BID-V1685/2007	Viet Nam	2007	AI	AI-2
726	FJ024461	Dengue virus 2 isolate DENV-2/VN/BID-V1697/2007	Viet Nam	2007	AI	AI-2
727	FJ205877	Dengue virus 2 isolate DENV-2/VN/BID-V1674/2007	Viet Nam	2007	AI	AI-2
728	FJ205878	Dengue virus 2 isolate DENV-2/VN/BID-V1680/2007	Viet Nam	2007	AI	AI-2
729	FJ205879	Dengue virus 2 isolate DENV-2/VN/BID-V1682/2007	Viet Nam	2007	AI	AI-2
730	FJ205880	Dengue virus 2 isolate DENV-2/VN/BID-V1690/2007	Viet Nam	2007	AI	AI-2
731	FJ373299	Dengue virus 2 isolate DENV-2/VN/BID-V1699/2007	Viet Nam	2007	AI	AI-2
732	FJ390384	Dengue virus 2 isolate DENV-2/VN/BID-V1679/2007	Viet Nam	2007	AI	AI-2
733	FJ390385	Dengue virus 2 isolate DENV-2/VN/BID-V1684/2007	Viet Nam	2007	AI	AI-2
734	FJ390387	Dengue virus 2 isolate DENV-2/VN/BID-V1696/2007	Viet Nam	2007	AI	AI-2
735	FJ410193	Dengue virus 2 isolate DENV-2/VN/BID-V1773/2007	Viet Nam	2007	AI	AI-2
736	FJ410195	Dengue virus 2 isolate DENV-2/VN/BID-V1776/2007	Viet Nam	2007	AI	AI-2
737	FJ410200	Dengue virus 2 isolate DENV-2/VN/BID-V1801/2007	Viet Nam	2007	AI	AI-2
738	FJ410202	Dengue virus 2 isolate DENV-2/VN/BID-V1807/2007	Viet Nam	2007	AI	AI-2
739	FJ410208	Dengue virus 2 isolate DENV-2/VN/BID-V1818/2007	Viet Nam	2007	AI	AI-2
740	FJ410215	Dengue virus 2 isolate DENV-2/VN/BID-V1844/2008	Viet Nam	2008	AI	AI-2
741	FJ410217	Dengue virus 2 isolate DENV-2/VN/BID-V1853/2007	Viet Nam	2007	AI	AI-2
742	FJ410219	Dengue virus 2 isolate DENV-2/VN/BID-V1857/2007	Viet Nam	2007	AI	AI-2
743	FJ410221	Dengue virus 2 isolate DENV-2/VN/BID-V1864/2007	Viet Nam	2007	AI	AI-2
744	FJ410223	Dengue virus 2 isolate DENV-2/VN/BID-V1869/2007	Viet Nam	2007	AI	AI-2
745	FJ410224	Dengue virus 2 isolate DENV-2/VN/BID-V1872/2007	Viet Nam	2007	AI	AI-2
746	FJ410228	Dengue virus 2 isolate DENV-2/VN/BID-V1881/2007	Viet Nam	2007	AI	AI-2
747	FJ410233	Dengue virus 2 isolate DENV-2/VN/BID-V1895/2008	Viet Nam	2008	AI	AI-2
748	FJ410237	Dengue virus 2 isolate DENV-2/VN/BID-V1900/2008	Viet Nam	2008	AI	AI-2
749	FJ410241	Dengue virus 2 isolate DENV-2/VN/BID-V1905/2008	Viet Nam	2008	AI	AI-2
750	FJ410259	Dengue virus 2 isolate DENV-2/VN/BID-V1928/2008	Viet Nam	2008	AI	AI-2
751	FJ410288	Dengue virus 2 isolate DENV-2/VN/BID-V1654/2007	Viet Nam	2007	AI	AI-2
752	FJ432724	Dengue virus 2 isolate DENV-2/VN/BID-V1777/2007	Viet Nam	2007	AI	AI-2
753	FJ432726	Dengue virus 2 isolate DENV-2/VN/BID-V1780/2007	Viet Nam	2007	AI	AI-2
754	FJ461305	Dengue virus 2 isolate DENV-2/VN/BID-V1837/2007	Viet Nam	2007	AI	AI-2
755	FJ461309	Dengue virus 2 isolate DENV-2/VN/BID-V1845/2008	Viet Nam	2008	AI	AI-2
756	FJ461311	Dengue virus 2 isolate DENV-2/VN/BID-V1848/2008	Viet Nam	2008	AI	AI-2
757	FJ461314	Dengue virus 2 isolate DENV-2/VN/BID-V1858/2007	Viet Nam	2007	AI	AI-2
758	FJ461321	Dengue virus 2 isolate DENV-2/VN/BID-V1873/2007	Viet Nam	2007	AI	AI-2
759	FJ547064	Dengue virus 2 isolate DENV-2/VN/BID-V1868/2007	Viet Nam	2007	AI	AI-2
760	FJ547067	Dengue virus 2 isolate DENV-2/VN/BID-V1930/2007	Viet Nam	2007	AI	AI-2
761	FJ562098	Dengue virus 2 isolate DENV-2/VN/BID-V1794/2007	Viet Nam	2007	AI	AI-2
762	FJ639704	Dengue virus 2 isolate DENV-2/KH/BID-V2036/2003	Cambodia	2003	AI	AI-2
763	FJ639705	Dengue virus 2 isolate DENV-2/KH/BID-V2039/2003	Cambodia	2003	AI	AI-2
764	FJ639706	Dengue virus 2 isolate DENV-2/KH/BID-V2040/2004	Cambodia	2004	AI	AI-2
765	FJ639707	Dengue virus 2 isolate DENV-2/KH/BID-V2041/2004	Cambodia	2004	AI	AI-2
766	FJ639708	Dengue virus 2 isolate DENV-2/KH/BID-V2042/2005	Cambodia	2005	AI	AI-2
767	FJ639709	Dengue virus 2 isolate DENV-2/KH/BID-V2043/2005	Cambodia	2005	AI	AI-2
768	FJ639710	Dengue virus 2 isolate DENV-2/KH/BID-V2044/2005	Cambodia	2005	AI	AI-2
769	FJ639711	Dengue virus 2 isolate DENV-2/KH/BID-V2045/2005	Cambodia	2005	AI	AI-2
770	FJ639717	Dengue virus 2 isolate DENV-2/KH/BID-V2066/2007	Cambodia	2007	AI	AI-2
771	FJ639718	Dengue virus 2 isolate DENV-2/KH/BID-V2068/2008	Cambodia	2008	AI	AI-2
772	FJ639832	Dengue virus 2 isolate DENV-2/TH/BID-V2157/2001	Thailand	2001	AI	AI-2
773	FJ687437	Dengue virus 2 isolate DENV-2/TH/BID-V2281/2001	Thailand	2001	AI	AI-2
774	FJ687438	Dengue virus 2 isolate DENV-2/TH/BID-V2282/2001	Thailand	2001	AI	AI-2
775	FJ687439	Dengue virus 2 isolate DENV-2/TH/BID-V2283/2001	Thailand	2001	AI	AI-2
776	FJ687440	Dengue virus 2 isolate DENV-2/TH/BID-V2284/2001	Thailand	2001	AI	AI-2
777	FJ687441	Dengue virus 2 isolate DENV-2/TH/BID-V2286/2001	Thailand	2001	AI	AI-2
778	FJ687442	Dengue virus 2 isolate DENV-2/TH/BID-V2287/2001	Thailand	2001	AI	AI-2
779	FJ687443	Dengue virus 2 isolate DENV-2/TH/BID-V2288/2001	Thailand	2001	AI	AI-2
780	FJ687447	Dengue virus 2 isolate DENV-2/TH/BID-V2293/2001	Thailand	2001	AI	AI-2
781	FJ744710	Dengue virus 2 isolate DENV-2/TH/BID-V2294/2001	Thailand	2001	AI	AI-2
782	FJ744711	Dengue virus 2 isolate DENV-2/TH/BID-V2295/2001	Thailand	2001	AI	AI-2
783	FJ744712	Dengue virus 2 isolate DENV-2/TH/BID-V2296/2001	Thailand	2001	AI	AI-2
784	FJ744713	Dengue virus 2 isolate DENV-2/TH/BID-V2298/2001	Thailand	2001	AI	AI-2
785	FJ744714	Dengue virus 2 isolate DENV-2/TH/BID-V2300/2001	Thailand	2001	AI	AI-2
786	FJ744715	Dengue virus 2 isolate DENV-2/TH/BID-V2301/2001	Thailand	2001	AI	AI-2
787	FJ744716	Dengue virus 2 isolate DENV-2/TH/BID-V2302/2001	Thailand	2001	AI	AI-2
788	FJ744717	Dengue virus 2 isolate DENV-2/TH/BID-V2303/2001	Thailand	2001	AI	AI-2
789	FJ744718	Dengue virus 2 isolate DENV-2/TH/BID-V2304/2001	Thailand	2001	AI	AI-2
790	FJ744724	Dengue virus 2 isolate DENV-2/TH/BID-V2310/2001	Thailand	2001	AI	AI-2
791	FJ744725	Dengue virus 2 isolate DENV-2/TH/BID-V2311/2001	Thailand	2001	AI	AI-2
792	FJ810409	Dengue virus 2 isolate DENV-2/TH/BID-V2285/2001	Thailand	2001	AI	AI-2
793	FJ810411	Dengue virus 2 isolate DENV-2/TH/BID-V2297/2001	Thailand	2001	AI	AI-2
794	FJ810412	Dengue virus 2 isolate DENV-2/TH/BID-V2299/2001	Thailand	2001	AI	AI-2
795	FJ859028	Dengue virus 2 isolate DENV-2/VN/BID-V1796/2007	Viet Nam	2007	AI	AI-2
796	FJ873811	Dengue virus 2 isolate DENV-2/VN/BID-V922/2006	Viet Nam	2006	AI	AI-2
797	FJ898452	Dengue virus 2 isolate DENV-2/TH/BID-V2957/2003	Thailand	2003	AI	AI-2
798	FJ906957	Dengue virus 2 isolate DENV-2/TH/BID-V2616/1996	Thailand	1996	AI	AI-2
799	FM210205	Dengue virus 2 isolate MD1533	Viet Nam	2005	AI	AI-2
800	FM210206	Dengue virus 2 isolate MD1600	Viet Nam	2005	AI	AI-2
801	FM210207	Dengue virus 2 isolate MD1619	Viet Nam	2005	AI	AI-2
802	FM210211	Dengue virus 2 isolate DF907	Viet Nam	2003	AI	AI-2
803	FM210214	Dengue virus 2 isolate CSF63	Viet Nam	2004	AI	AI-2
804	FM210215	Dengue virus 2 isolate DF380	Viet Nam	2004	AI	AI-2
805	FM210216	Dengue virus 2 isolate DF401	Viet Nam	2004	AI	AI-2
806	FM210231	Dengue virus 2 isolate MD1240	Viet Nam	2004	AI	AI-2
807	FM210233	Dengue virus 2 isolate MD1272	Viet Nam	2004	AI	AI-2
808	FM210240	Dengue virus 2 isolate MD1273	Viet Nam	2004	AI	AI-2
809	FM210242	Dengue virus 2 isolate MD1279	Viet Nam	2004	AI	AI-2
810	FM210245	Dengue virus 2 isolate MD1520	Viet Nam	2005	AI	AI-2
811	FM210246	Dengue virus 2 isolate MD1618	Viet Nam	2005	AI	AI-2
812	GQ868543	Dengue virus 2 isolate DENV-2/TH/BID-V3501/1995	Thailand	1995	AI	AI-2
813	GQ868620	Dengue virus 2 isolate DENV-2/KH/BID-V2028/2003	Cambodia	2003	AI	AI-2
814	GQ868621	Dengue virus 2 isolate DENV-2/KH/BID-V2034/2003	Cambodia	2003	AI	AI-2
815	GQ868622	Dengue virus 2 isolate DENV-2/KH/BID-V2037/2003	Cambodia	2003	AI	AI-2
816	GQ868623	Dengue virus 2 isolate DENV-2/KH/BID-V2047/2005	Cambodia	2005	AI	AI-2
817	GQ868624	Dengue virus 2 isolate DENV-2/KH/BID-V2062/2007	Cambodia	2007	AI	AI-2
818	GQ868625	Dengue virus 2 isolate DENV-2/KH/BID-V2069/2008	Cambodia	2008	AI	AI-2
819	GQ868631	Dengue virus 2 isolate DENV-2/IPC/BID-V3791/2008	Cambodia	2008	AI	AI-2
820	GQ868638	Dengue virus 2 isolate DENV-2/IPC/BID-V3924/2008	Cambodia	2008	AI	AI-2
821	GU131886	Dengue virus 2 isolate DENV-2/TH/BID-V4325/2001	Thailand	2001	AI	AI-2
822	GU131896	Dengue virus 2 isolate DENV-2/IPC/BID-V3788/2007	Cambodia	2007	AI	AI-2
823	GU131897	Dengue virus 2 isolate DENV-2/IPC/BID-V3789/2007	Cambodia	2007	AI	AI-2
824	GU131898	Dengue virus 2 isolate DENV-2/IPC/BID-V3795/2008	Cambodia	2008	AI	AI-2
825	GU131899	Dengue virus 2 isolate DENV-2/IPC/BID-V3796/2008	Cambodia	2008	AI	AI-2
826	GU131900	Dengue virus 2 isolate DENV-2/IPC/BID-V3797/2008	Cambodia	2008	AI	AI-2
827	GU131901	Dengue virus 2 isolate DENV-2/IPC/BID-V3798/2008	Cambodia	2008	AI	AI-2
828	GU131902	Dengue virus 2 isolate DENV-2/IPC/BID-V3799/2008	Cambodia	2008	AI	AI-2
829	GU131924	Dengue virus 2 isolate DENV-2/IPC/BID-V3922/2008	Cambodia	2008	AI	AI-2
830	GU131927	Dengue virus 2 isolate DENV-2/IPC/BID-V4265/2007	Cambodia	2007	AI	AI-2
831	GU131928	Dengue virus 2 isolate DENV-2/IPC/BID-V4266/2008	Cambodia	2008	AI	AI-2
832	GU131929	Dengue virus 2 isolate DENV-2/IPC/BID-V4268/2008	Cambodia	2008	AI	AI-2
833	GU131930	Dengue virus 2 isolate DENV-2/IPC/BID-V4270/2008	Cambodia	2008	AI	AI-2
834	GU131931	Dengue virus 2 isolate DENV-2/IPC/BID-V4271/2008	Cambodia	2008	AI	AI-2
835	GU131932	Dengue virus 2 isolate DENV-2/IPC/BID-V4277/2008	Cambodia	2008	AI	AI-2
836	JF730045	Dengue virus 2 isolate DENV-2/KH/BID-V4267/2008	Cambodia	2008	AI	AI-2
837	JF730046	Dengue virus 2 isolate DENV-2/KH/BID-V4272/2008	Cambodia	2008	AI	AI-2
838	JF730047	Dengue virus 2 isolate DENV-2/KH/BID-V4273/2008	Cambodia	2008	AI	AI-2
839	JF730048	Dengue virus 2 isolate DENV-2/KH/BID-V4274/2008	Cambodia	2008	AI	AI-2
840	JF730049	Dengue virus 2 isolate DENV-2/VN/BID-V1781/2007	Viet Nam	2007	AI	AI-2
841	JN368476	NA	Cambodia	2007	AI	AI-2
842	JQ045670	Dengue virus 2 isolate DENV2/Vietnam/10dx-206-801-Placebo-0hrs	Viet Nam	NA	AI	AI-2
843	JQ045676	Dengue virus 2 isolate DENV2/Vietnam/10dx-217-802-3000mg-48hrs	Viet Nam	NA	AI	AI-2
844	JQ045678	Dengue virus 2 isolate DENV2/Vietnam/10dx-224-801-3000mg-24hrs	Viet Nam	NA	AI	AI-2
845	JQ045684	Dengue virus 2 isolate DENV2/Vietnam/10dx-234-802-3000mg-36hrs	Viet Nam	NA	AI	AI-2
846	JQ045686	Dengue virus 2 isolate DENV2/Vietnam/10dx-236-802-Placebo-24hrs	Viet Nam	NA	AI	AI-2
847	GQ868591	Dengue virus 2 isolate DENV-2/TH/BID-V3357/1964	Thailand	1964	AI	AI-1
848	AJ487271	NA	Thailand	1974	AI	AI-1
849	DQ181806	Dengue virus type 2 strain ThD2_0038_74	Thailand	1974	AI	AI-1
850	GU289914	Dengue virus 2 strain S16803	Thailand	1974	AI	AI-1
851	DQ181805	Dengue virus type 2 strain ThD2_0168_79	Thailand	1979	AI	AI-1
852	DQ181804	Dengue virus type 2 strain ThD2_0498_84	Thailand	1984	AI	AI-1
853	DQ181803	Dengue virus type 2 strain ThD2_0433_85	Thailand	1985	AI	AI-1
854	DQ181802	Dengue virus type 2 strain ThD2_0026_88	Thailand	1988	AI	AI-1
855	EU687246	Dengue virus 2 isolate DENV-2/TH/BID-V1498/1994	Thailand	1994	AI	AI-1
856	EU726767	Dengue virus 2 isolate DENV-2/TH/BID-V1458/1994	Thailand	1994	AI	AI-1
857	GQ868542	Dengue virus 2 isolate DENV-2/TH/BID-V3498/1994	Thailand	1994	AI	AI-1
858	DQ181800	Dengue virus type 2 strain ThD2_0263_95	Thailand	1995	AI	AI-1
859	FJ906958	Dengue virus 2 isolate DENV-2/TH/BID-V2617/1996	Thailand	1996	AI	AI-1
860	GQ868544	Dengue virus 2 isolate DENV-2/TH/BID-V3499/1996	Thailand	1996	AI	AI-1
861	GQ868545	Dengue virus 2 isolate DENV-2/TH/BID-V3500/1996	Thailand	1996	AI	AI-1
862	DQ181799	Dengue virus type 2 strain ThD2_0017_98	Thailand	1998	AI	AI-1
863	FJ196851	Dengue virus 2 isolate GD08/98	China	1998	AI	AI-1
864	DQ181798	Dengue virus type 2 strain ThD2_0055_99	Thailand	1999	AI	AI-1
865	FJ639828	Dengue virus 2 isolate DENV-2/TH/BID-V2153/2001	Thailand	2001	AI	AI-1
866	FJ639829	Dengue virus 2 isolate DENV-2/TH/BID-V2154/2001	Thailand	2001	AI	AI-1
867	FJ639830	Dengue virus 2 isolate DENV-2/TH/BID-V2155/2001	Thailand	2001	AI	AI-1
868	FJ639831	Dengue virus 2 isolate DENV-2/TH/BID-V2156/2001	Thailand	2001	AI	AI-1
869	FJ687434	Dengue virus 2 isolate DENV-2/TH/BID-V2278/2001	Thailand	2001	AI	AI-1
870	FJ687435	Dengue virus 2 isolate DENV-2/TH/BID-V2279/2001	Thailand	2001	AI	AI-1
871	FJ687436	Dengue virus 2 isolate DENV-2/TH/BID-V2280/2001	Thailand	2001	AI	AI-1
872	FJ687444	Dengue virus 2 isolate DENV-2/TH/BID-V2289/2001	Thailand	2001	AI	AI-1
873	FJ687445	Dengue virus 2 isolate DENV-2/TH/BID-V2290/2001	Thailand	2001	AI	AI-1
874	FJ687446	Dengue virus 2 isolate DENV-2/TH/BID-V2292/2001	Thailand	2001	AI	AI-1
875	FJ744719	Dengue virus 2 isolate DENV-2/TH/BID-V2305/2001	Thailand	2001	AI	AI-1
876	FJ744720	Dengue virus 2 isolate DENV-2/TH/BID-V2306/2001	Thailand	2001	AI	AI-1
877	FJ744721	Dengue virus 2 isolate DENV-2/TH/BID-V2307/2001	Thailand	2001	AI	AI-1
878	FJ744722	Dengue virus 2 isolate DENV-2/TH/BID-V2308/2001	Thailand	2001	AI	AI-1
879	FJ744723	Dengue virus 2 isolate DENV-2/TH/BID-V2309/2001	Thailand	2001	AI	AI-1
880	FJ810410	Dengue virus 2 isolate DENV-2/TH/BID-V2291/2001	Thailand	2001	AI	AI-1
881	AF022434	Dengue virus type 2 strain ThNH-7/93	Thailand	1993	AI	AI-1
882	AF022435	Dengue virus type 2 strain ThNH-28/93	Thailand	1993	AI	AI-1
883	AF022436	Dengue virus type 2 strain ThNH-52/93	Thailand	1993	AI	AI-1
884	AF022437	Dengue virus type 2 strain ThNH-p11/93	Thailand	1993	AI	AI-1
885	AF022438	Dengue virus type 2 strain ThNH-p12/93	Thailand	1993	AI	AI-1
886	AF022439	Dengue virus type 2 strain ThNH-p14/93	Thailand	1993	AI	AI-1
887	AF022440	Dengue virus type 2 strain ThNH-p16/93	Thailand	1993	AI	AI-1
888	AF022441	Dengue virus type 2 strain ThNH-p36/93	Thailand	1993	AI	AI-1
889	AF100459	Dengue virus type 2 strain K0008	NA	NA	AI	AI-1
890	AF100460	Dengue virus type 2 strain K0010	NA	NA	AI	AI-1
891	AF100461	Dengue virus type 2 strain C0371	NA	NA	AI	AI-1
892	AF100462	Dengue virus type 2 strain C0390	NA	NA	AI	AI-1
893	AF100463	Dengue virus type 2 strain C0166	NA	NA	AI	AI-1
894	AF100464	Dengue virus type 2 strain C0167	NA	NA	AI	AI-1
895	AF169678	Dengue virus type 2 strain ThNH29/93	NA	NA	AI	AI-1
896	AF169679	Dengue virus type 2 strain ThNH36/93	NA	NA	AI	AI-1
897	AF169680	Dengue virus type 2 strain ThNH45/93	NA	NA	AI	AI-1
898	AF169681	Dengue virus type 2 strain ThNH55/93	NA	NA	AI	AI-1
899	AF169682	Dengue virus type 2 strain ThNH54/93	NA	NA	AI	AI-1
900	AF169683	Dengue virus type 2 strain ThNH62/93	NA	NA	AI	AI-1
901	AF169684	Dengue virus type 2 strain ThNH63/93	NA	NA	AI	AI-1
902	AF169685	Dengue virus type 2 strain ThNH69/93	NA	NA	AI	AI-1
903	AF169686	Dengue virus type 2 strain ThNH73/93	NA	NA	AI	AI-1
904	AF169687	Dengue virus type 2 strain ThNH76/93	NA	NA	AI	AI-1
905	AF169688	Dengue virus type 2 strain ThNH81/93	NA	NA	AI	AI-1
906	M84727	Dengue virus type 2 strain 16681	NA	NA	AI	AI-1
907	M84728	Dengue virus type 2 strain 16681-PDK53	NA	NA	AI	AI-1
908	U87411	Dengue virus type 2 (strain 16681)	NA	NA	AI	AI-1
909	U87412	NA	NA	NA	AI	AI-1
910	EF105378	Dengue virus type 2 strain PM33974	Guinea	1981	S	S1
911	EF105380	Dengue virus type 2 isolate Dak Ar 578	Cote d'Ivoire	1980	S	S1
912	EF105381	Dengue virus type 2 isolate Dak Ar 510	Cote d'Ivoire	1980	S	S1
913	EF105382	Dengue virus type 2 isolate Dak Ar 2039	Burkina Faso	1980	S	S1
914	EF105383	Dengue virus type 2 isolate Dak Ar A1247	Cote d'Ivoire	1980	S	S1
915	EF105384	Dengue virus type 2 isolate Dak HD 10674	Senegal	1970	S	S1
916	EF105385	Dengue virus type 2 isolate Dak Ar D20761	Senegal	1974	S	S1
917	EF105386	Dengue virus type 2 isolate Dak Ar A2022	Burkina Faso	1980	S	S1
918	EF105387	Dengue virus type 2 isolate IBH11208	Nigeria	1966	S	S1
919	EF105388	Dengue virus type 2 isolate IBH11664	Nigeria	1966	S	S1
920	EF105389	Dengue virus type 2 isolate Dak Ar 141069	Senegal	1999	S	S1
921	EF105390	Dengue virus type 2 isolate Dak Ar 141070	Senegal	1999	S	S1
922	EF457904	Dengue virus type 2 isolate Dak Ar D75505	Senegal	1999	S	S1
923	EU003591	Dengue virus type 2 isolate IBH11234	Nigeria		S	S1
924	FJ467493	Dengue virus 2 isolate DKD811	Malaysia	2008	S	S2
925	EF105379	Dengue virus type 2 isolate P8-1407	Malaysia	1970	S	S2
926	AF100465	Dengue virus type 2 strain Ven2	NA	NA	AM	AM
927	AF100467	Dengue virus type 2 strain IQT1797	NA	NA	AM	AM
928	AF100468	Dengue virus type 2 strain IQT2913	NA	NA	AM	AM
929	AF100469	Dengue virus type 2 strain 131	NA	NA	AM	AM
930	AY702040	Dengue virus type 2 strain I348600	Colombia	1986	AM	AM
931	AY744147	strain Tonga/74	Tonga	NA	AM	AM
932	EU056811	Dengue virus type 2 isolate IQT-1950	Peru	1995	AM	AM
933	EU056812	Dengue virus type 2 isolate 1328	Puerto Rico	1977	AM	AM
934	FJ898449	Dengue virus 2 isolate DENV-2/HN/BID-V2945/1984	Honduras	1984	AM	AM
935	GQ398257	Dengue virus 2 strain DENV-2/ID/1183DN/1977	Indonesia	1977	AM	AM
936	GQ868588	Dengue virus 2 isolate DENV-2/MX/BID-V3354/1983	Mexico	1983	AM	AM
937	GQ868589	Dengue virus 2 isolate DENV-2/MX/BID-V3355/1983	Mexico	1983	AM	AM
938	GQ868590	Dengue virus 2 isolate DENV-2/MX/BID-V3356/1992	Mexico	1992	AM	AM
939	GQ868592	Dengue virus 2 isolate DENV-2/CO/BID-V3358/1986	Colombia	1986	AM	AM
940	GQ868599	Dengue virus 2 isolate DENV-2/VE/BID-V3366/1987	Venezuela	1987	AM	AM
941	GQ868600	Dengue virus 2 isolate DENV-2/PR/BID-V3367/1969	Puerto Rico	1969	AM	AM
942	HM582099	Dengue virus 2 strain D2/FJ/UH21/1971	Fiji	1971	AM	AM
943	HM582100	Dengue virus 2 strain D2/FJ/UH40/1971	Fiji	1971	AM	AM
944	HM582101	Dengue virus 2 strain D2/FJ/UH22/1971	Fiji	1971	AM	AM
945	HM582102	Dengue virus 2 strain D2/NC/UH37/1971	New Caledonia	1971	AM	AM
946	HM582103	Dengue virus 2 strain D2/NC/UH97/1972	New Caledonia	1972	AM	AM
947	HM582104	Dengue virus 2 strain D2/AS/UH77/1972	American Samoa	1972	AM	AM
948	HM582105	Dengue virus 2 strain D2/AS/UH79/1972	American Samoa	1972	AM	AM
949	HM582106	Dengue virus 2 strain D2/AS/UH85/1972	American Samoa	1972	AM	AM
950	HM582107	Dengue virus 2 strain D2/AS/UH73/1972	American Samoa	1972	AM	AM
951	HM582108	Dengue virus 2 strain D2/PF/UH50/1972	French Polynesia	1972	AM	AM
952	HM582109	Dengue virus 2 strain D2/PF/UH57/1971	French Polynesia	1971	AM	AM
953	HM582110	Dengue virus 2 strain D2/PF/UH00/1973	French Polynesia	1973	AM	AM
954	HM582111	Dengue virus 2 strain D2/TO/UH16/1974	Tonga	1974	AM	AM
955	HM582112	Dengue virus 2 strain D2/TO/UH19/1974	Tonga	1974	AM	AM
956	HM582113	Dengue virus 2 strain D2/TO/UH20/1974	Tonga	1974	AM	AM
957	HM582114	Dengue virus 2 strain D2/TO/UH39/1974	Tonga	1974	AM	AM
958	HM582115	Dengue virus 2 strain D2/TO/UH44/1974	Tonga	1974	AM	AM
959	HM582116	Dengue virus 2 strain D2/TO/UH94/1974	Tonga	1974	AM	AM
960	HM582117	Dengue virus 2 strain D2/TO/UH04/1974	Tonga	1974	AM	AM
961	JQ922550	Dengue virus 2 isolate DENV-2/IND/715394/1971	India	1971	AM	AM
962	JQ922552	Dengue virus 2 isolate DENV-2/IND/P23085/1960	India	1960	AM	AM
963	JQ922553	Dengue virus 2 isolate DENV-2/IND/803347/1980	India	1980	AM	AM
964	M19197	Dengue virus type 2 (S1 vaccine strain)	NA	NA	AM	AM
965	FJ906966	Dengue virus 2 isolate DENV-2/Harvard/BID-V2990/2009	NA	2009	AII	AII
966	FJ906967	Dengue virus 2 isolate DENV-2/Harvard/BID-V2991/2009	NA	2009	AII	AII
967	FJ906968	Dengue virus 2 isolate DENV-2/Harvard/BID-V2992/2009	NA	2009	AII	AII
968	FJ906969	Dengue virus 2 isolate DENV-2/Harvard/BID-V2993/2009	NA	2009	AII	AII
969	FJ906959	Dengue virus 2 isolate DENV-2/PG/BID-V2618/2008	Papua New Guinea	2008	AII	AII
970	HQ891023	Dengue virus 2 isolate DENV-2/TW/BID-V5054/2008	Taiwan	2008	AII	AII
971	HQ891024	Dengue virus 2 isolate DENV-2/TW/BID-V5056/2008	Taiwan	2008	AII	AII
972	GQ199899	Dengue virus 2 isolate DENV-2/UMASS-Medical/BID-V2619/2008	NA	2008	AII	AII
973	GQ199900	Dengue virus 2 isolate DENV-2/UMASS-Medical/BID-V2620/2008	NA	2008	AII	AII
974	GQ199901	Dengue virus 2 isolate DENV-2/UMASS-Medical/BID-V2621/2008	NA	2008	AII	AII
975	HQ541798	Dengue virus 2 isolate DENV-2/US/BID-V4824/2009	USA	2009	AII	AII
976	HQ541799	Dengue virus 2 isolate DENV-2/US/BID-V4825/2010	USA	2010	AII	AII
977	JN796245	Dengue virus 2 isolate DENV-2/US/BID-V5055/2008	USA	2008	AII	AII
978	JF730053	Dengue virus 2 isolate DENV-2/US/BID-V5411/2006	USA	2006	AII	AII
979	JF730050	Dengue virus 2 isolate DENV-2/US/BID-V5412/2007	USA	2007	AII	AII
980	JF730054	Dengue virus 2 isolate DENV-2/US/BID-V5413/2009	USA	2009	AII	AII
981	JF730055	Dengue virus 2 isolate DENV-2/US/BID-V5414/2009	USA	2009	AII	AII
982	GQ398268	Dengue virus 2 strain DENV-2/ID/1022DN/1975	Indonesia	1975	AII	AII
983	M29095	NA	NA	NA	AII	AII
984	AF204178	Dengue virus type 2 strain 43	China	1987	AII	AII
985	AF204177	Dengue virus type 2 strain 44	China	1989	AII	AII
986	AF038403	Dengue virus type 2 strain New Guinea C	NA	NA	AII	AII
987	AF038402	Dengue virus type 2 strain New Guinea C/PUO-218	NA	NA	AII	AII
988	AJ968413	NA	Taiwan	NA	AII	AII
989	FJ390389	Dengue virus 2 New Guinea C derivative strain	Papua New Guinea	1944	AII	AII
990	EU854293	Dengue virus 2 isolate DENV-2/CO/BID-V1599/1944	Colombia	1944	AII	AII
